# Supplementary material for: The Mechanism of Action of SAAP-148 Antimicrobial Peptide as Studied with NMR and Molecular Dynamics Simulations
Source: MDPI journal article supplement (doi:10.3390/pharmaceutics15030761), 2023-02-24
Supplement: s1 [file s1]

**Table S1.** Chemical shift of NH, H $\alpha$  and C $\alpha$  obtained experimentally (Spectra), for a random coil structure (POTENCI) or for an alpha-helix (ShiftX).

| Amino-acid |     | Spectra |            |            | POTENCI |            |            | ShiftX |            |            |
|------------|-----|---------|------------|------------|---------|------------|------------|--------|------------|------------|
| Name       | Num | NH      | H $\alpha$ | C $\alpha$ | NH      | H $\alpha$ | C $\alpha$ | NH     | H $\alpha$ | C $\alpha$ |
| L          | 1   | 8.79    | 4.10       | 57.9       | -       | -          | -          | 8.18   | 4.33       | 57.4       |
| K          | 2   | 8.74    | 4.06       | 59.9       | 8.27    | 4.31       | 56.2       | 8.50   | 4.13       | 58.7       |
| R          | 3   | 7.81    | 4.14       | 58.7       | 8.14    | 4.24       | 56.1       | 7.75   | 4.05       | 59.1       |
| V          | 4   | 7.85    | 3.83       | 65.9       | 7.96    | 4.01       | 62.3       | 8.13   | 4.45       | 65.6       |
| W          | 5   | 8.36    | 4.53       | 59.4       | 8.01    | 4.63       | 57.2       | 8.59   | 4.25       | 60.7       |
| K          | 6   | 7.93    | 3.80       | 61.5       | 7.90    | 4.17       | 56.2       | 8.19   | 4.07       | 59.2       |
| R          | 7   | 7.49    | 4.14       | 58.7       | 7.99    | 4.23       | 56.1       | 7.84   | 3.74       | 59.7       |
| V          | 8   | 8.29    | 3.59       | 66.5       | 7.97    | 4.03       | 62.2       | 8.08   | 4.38       | 66.3       |
| F          | 9   | 8.77    | 4.01       | 60.6       | 8.14    | 4.59       | 57.6       | 8.12   | 4.03       | 61.1       |
| K          | 10  | 7.59    | 3.78       | 60.0       | 8.01    | 4.22       | 56.1       | 8.08   | 3.96       | 59.8       |
| L          | 11  | 7.56    | 4.10       | 57.9       | 8.03    | 4.26       | 55.3       | 7.74   | 4.25       | 57.8       |
| L          | 12  | 8.45    | 4.10       | 57.9       | 8.03    | 4.29       | 55.3       | 8.15   | 4.25       | 57.9       |
| K          | 13  | 8.22    | 3.87       | 60.1       | 8.04    | 4.23       | 56.3       | 8.32   | 4.15       | 59.9       |
| R          | 14  | 7.63    | 4.14       | 58.7       | 8.06    | 4.17       | 56.1       | 8.15   | 4.00       | 59.3       |
| Y          | 15  | 8.11    | 4.39       | 61.0       | 7.97    | 4.46       | 57.9       | 7.78   | 4.34       | 61.2       |
| W          | 16  | 8.71    | 4.36       | 60.2       | 7.79    | 4.59       | 57.1       | 8.06   | 4.44       | 61.0       |
| R          | 17  | 7.95    | 3.85       | 58.6       | 7.84    | 4.14       | 56.2       | 8.19   | 4.15       | 59.6       |
| Q          | 18  | 7.70    | 4.15       | 57.0       | 8.08    | 4.22       | 56.0       | 7.93   | 4.12       | 58.3       |
| L          | 19  | 7.58    | 4.10       | 55.8       | 8.12    | 4.29       | 55.3       | 7.97   | 4.14       | 58.0       |
| K          | 20  | 7.59    | 4.04       | 59.1       | 8.13    | 4.27       | 56.0       | 8.21   | 4.02       | 59.3       |
| K          | 21  | 7.81    | 4.45       | 54.7       | 8.14    | 4.56       | 54.1       | 7.94   | 4.12       | 60.2       |
| P          | 22  | -       | 4.47       | 63.0       | 0.00    | 4.40       | 63.1       | -      | 4.41       | 66.0       |
| V          | 23  | 8.15    | 4.10       | 62.3       | 8.17    | 4.09       | 62.2       | 8.10   | 3.94       | 65.7       |
| R          | 24  | 8.29    | 4.45       | 54.7       | 8.32    | 4.34       | 55.7       | 7.86   | 4.16       | 55.7       |

- : Non determined.

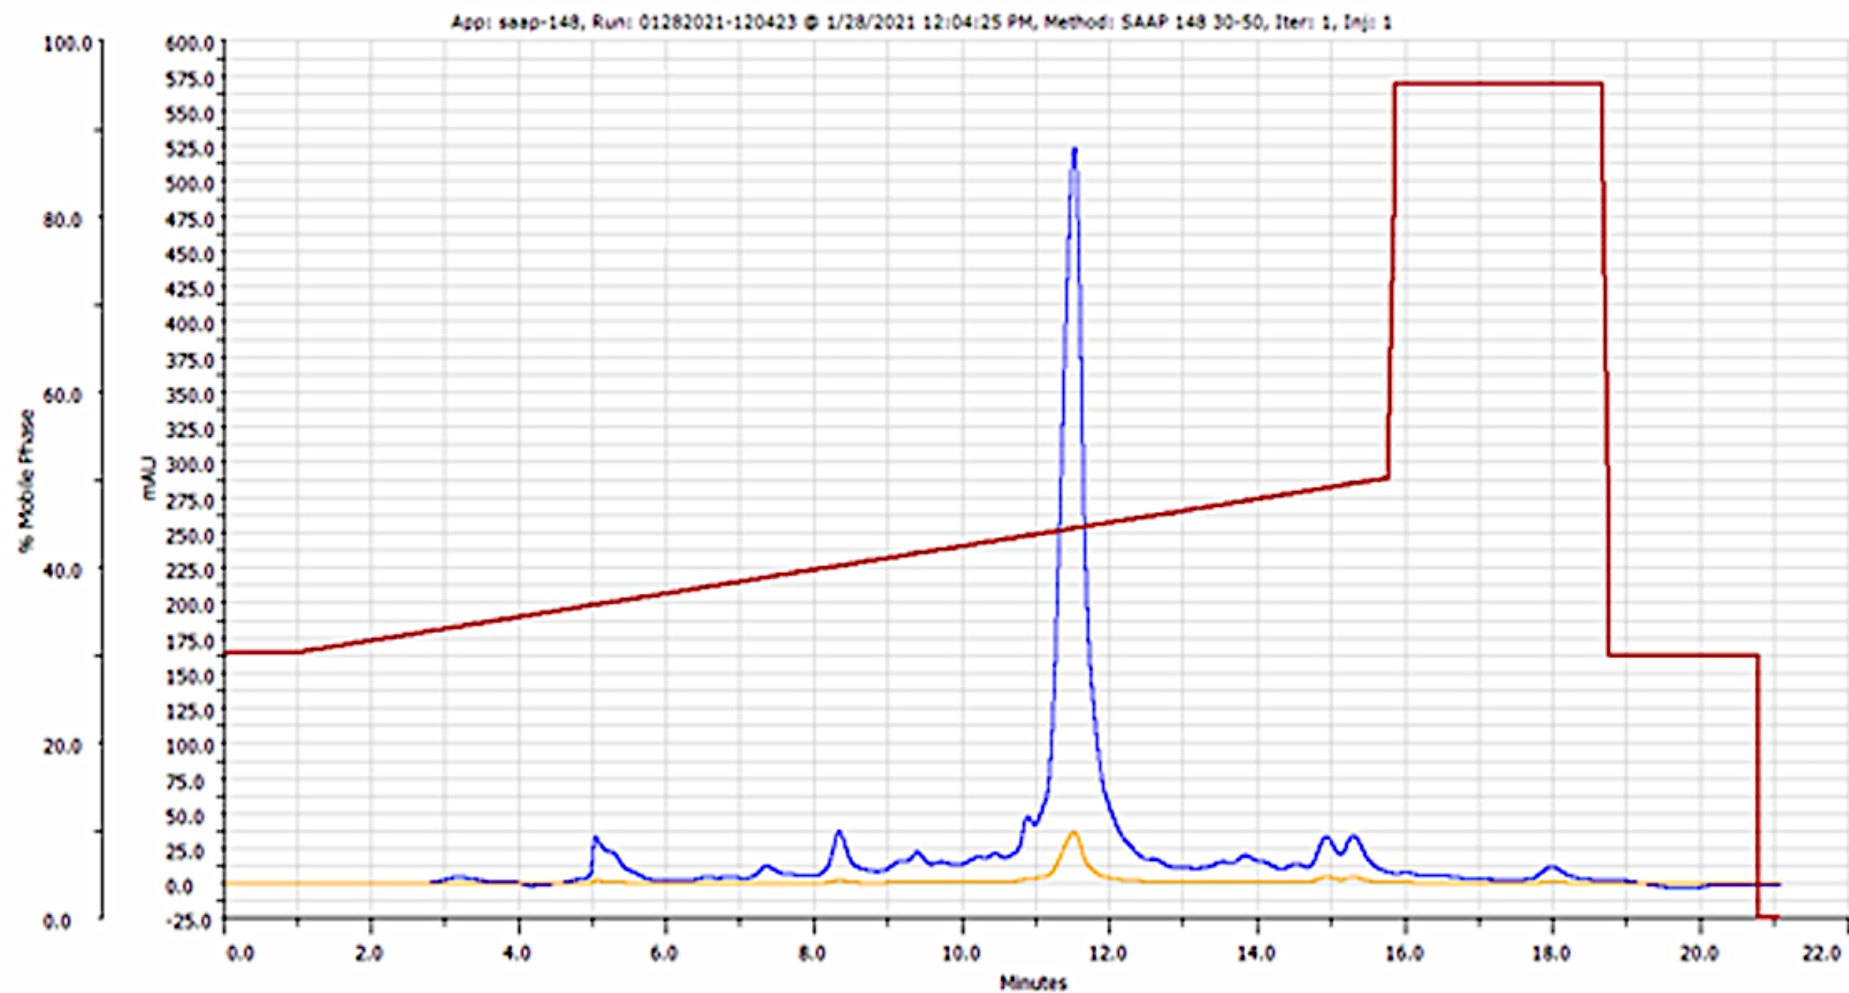

**Figure S1.** Analytical purity of SAAP-148 peptide: HPLC chromatogram. The peptide was purified by reverse phase HPLC (Gilson, Villiers-le-bel, France) using a preparative C18 column (Luna, C-18-100 Å-5 mm, Phenomenex, Le Pecq, France) and an acetonitrile/water gradient.

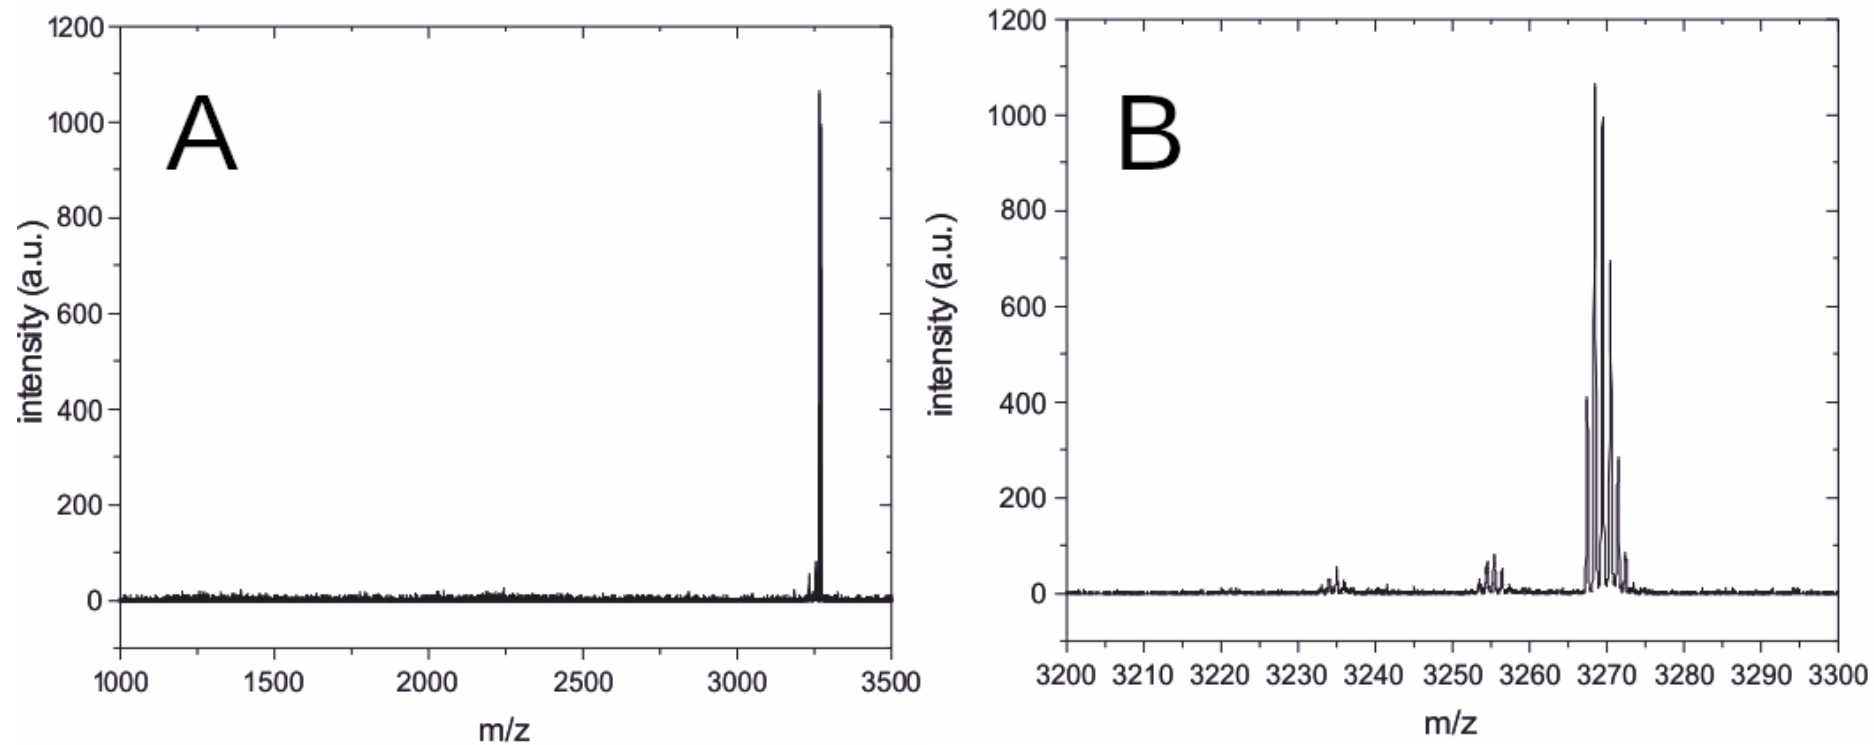

**Figure S2.** Analytical purity of SAAP-148 peptide: MALDI-TOF mass (A) with zoom (B) in the relevant region.

**A**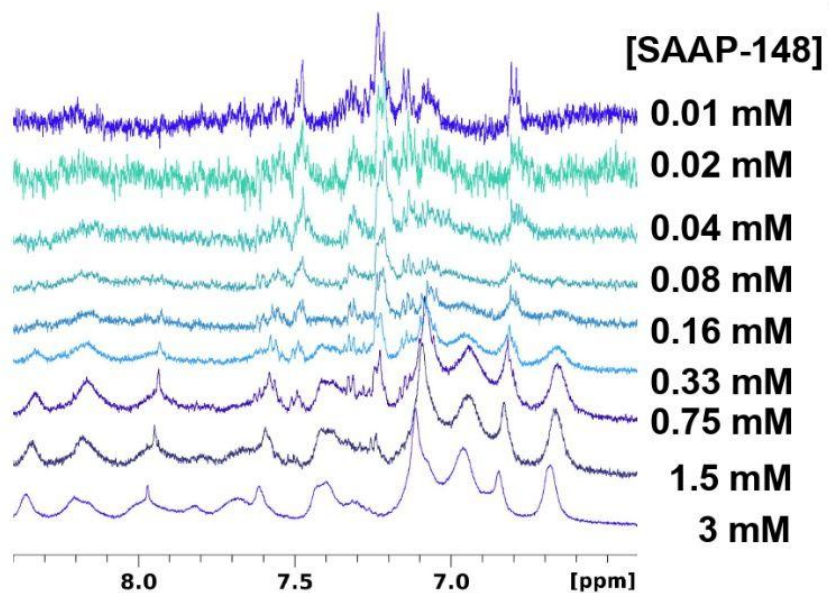**B**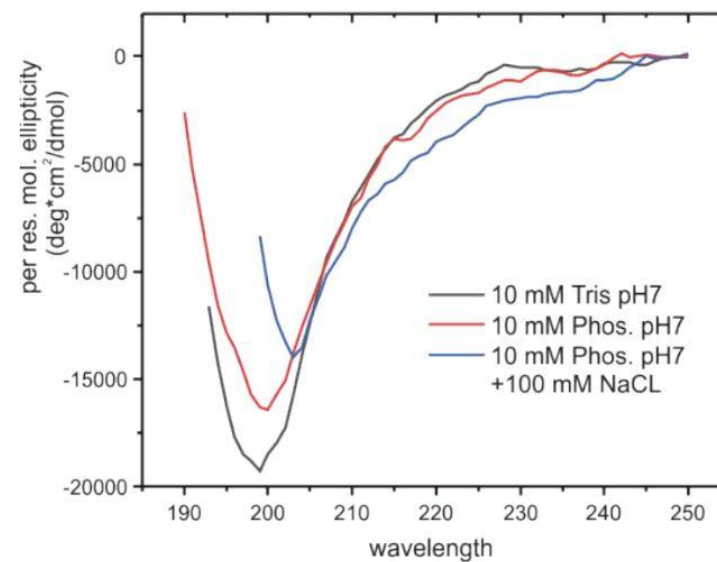

**Figure S3.** (A) Amino/aromatic region of 500 MHz  $^1\text{H}$  spectrum of SAAP-148 in phosphate buffer 50 mM at pH 6.6 ( $\text{H}_2\text{O}/10\%\text{D}_2\text{O}$ ) at 310K as a function of concentration. (B) Normalized circular dichroism spectra of 50  $\mu\text{M}$  SAAP-148 in 10 mM Tris pH7 (black), 10mM phosphate buffer pH7 (red) or 10mM phosphate buffer pH7 + 100mM NaCl (blue). The temperature was 310K.



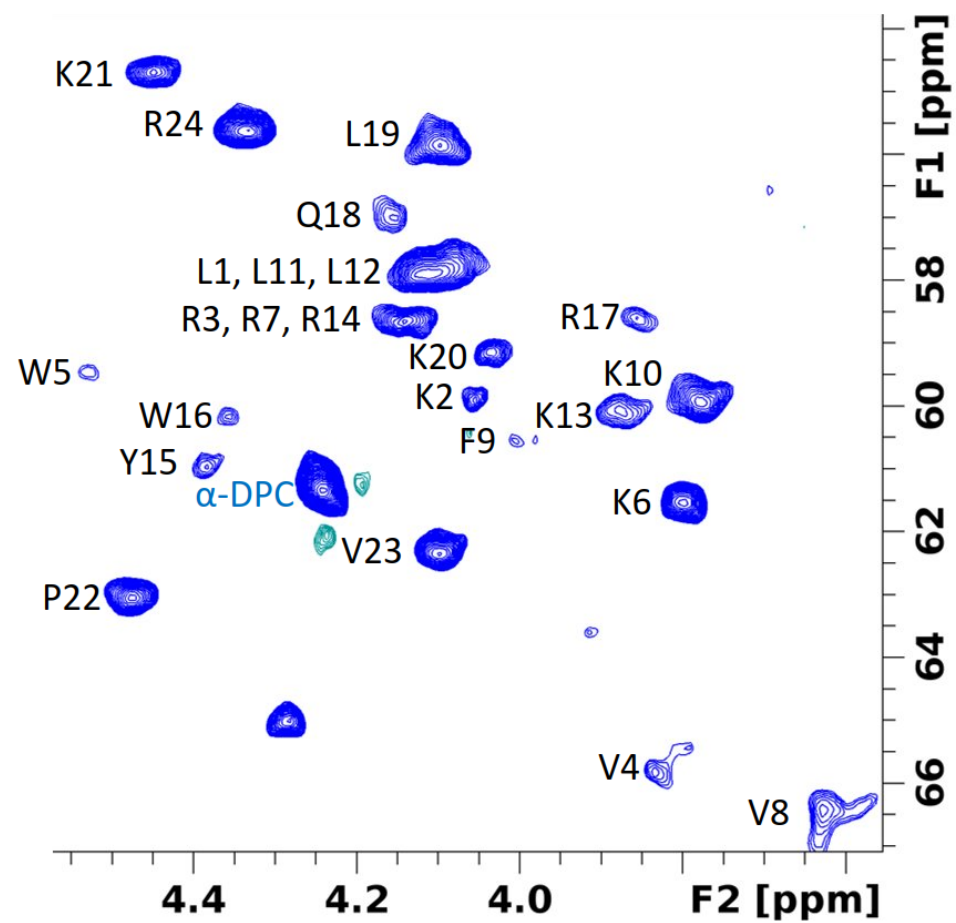

**Figure S4.**  $\text{H}_\alpha/\text{C}_\alpha$  region of 500 MHz  $^1\text{H}$ ,  $^{13}\text{C}$ -HSQC spectrum of SAAP-148 1.3 mM in DPC- $d_{38}$  micelles. The assignment of non-glycine residues (whose signal is outside the chosen region) is shown on each peak.

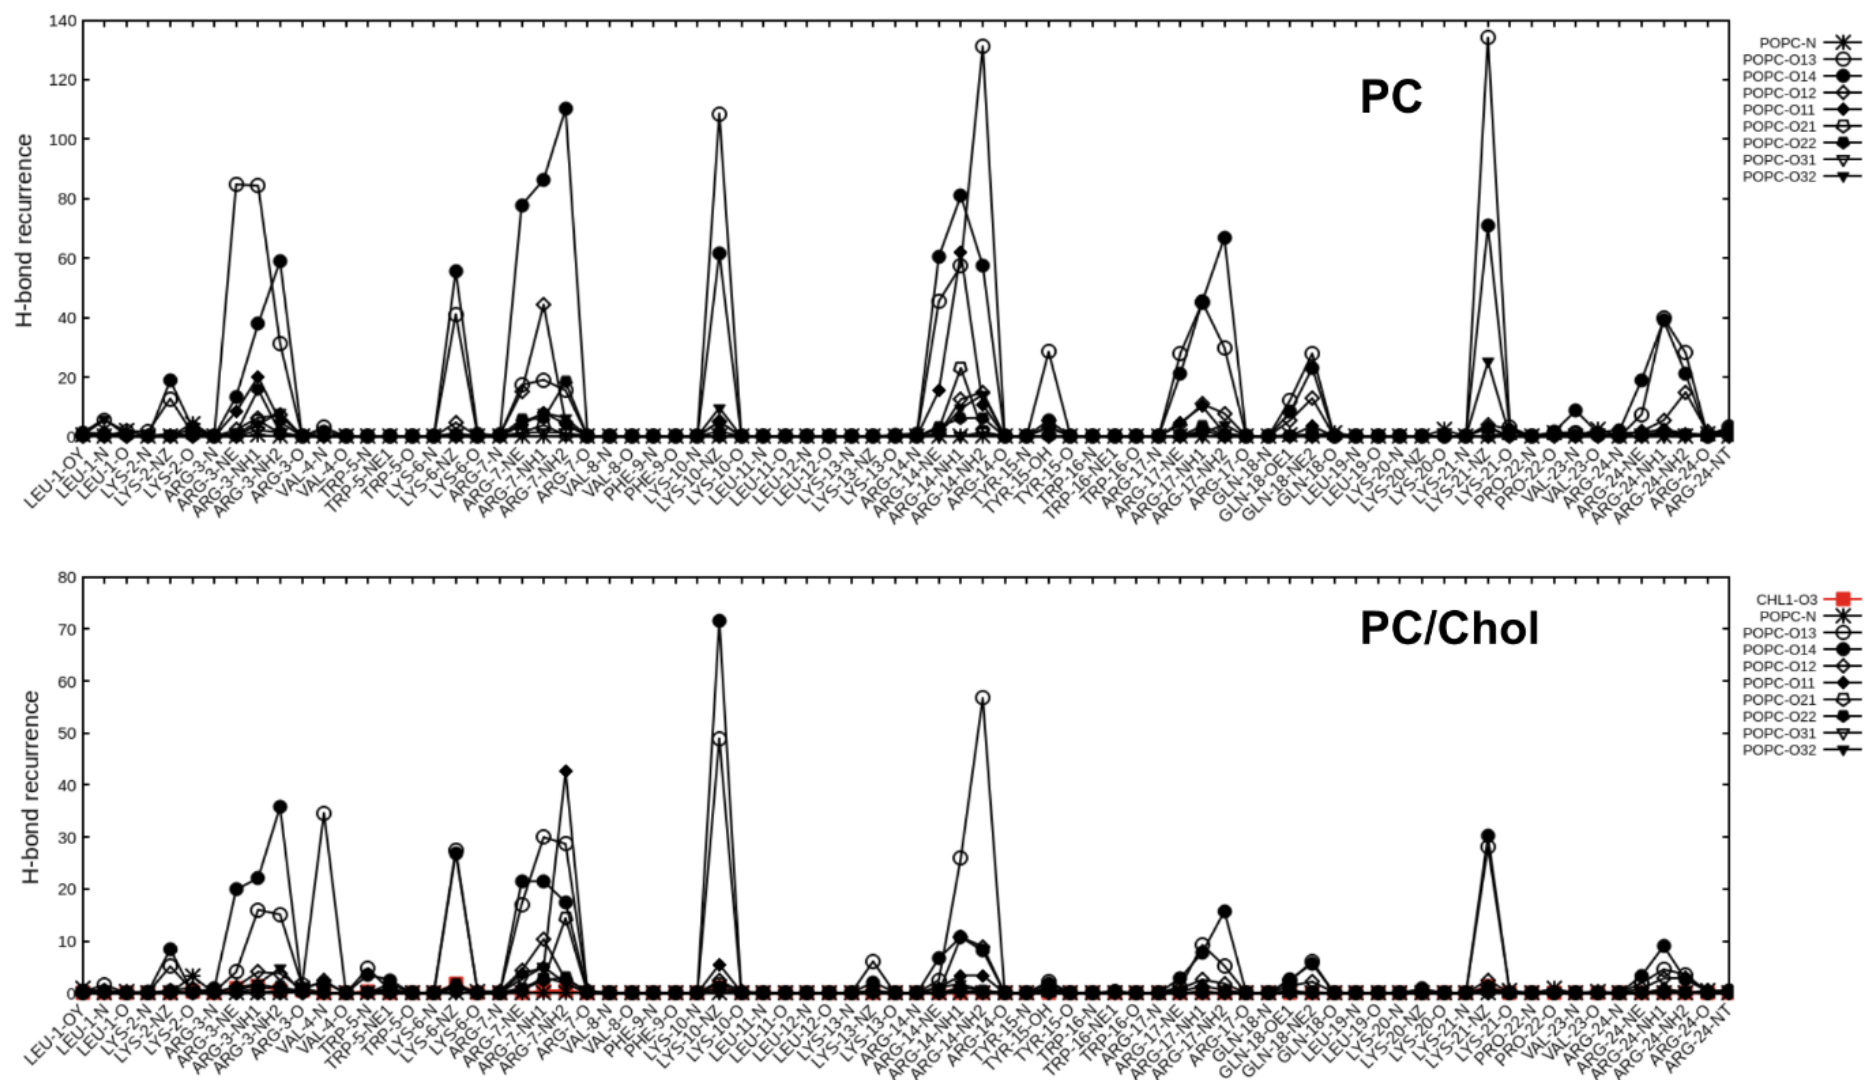

**Figure S5.** Polar contacts (hydrogen bonds and salt bridges) of SAAP-148 with different lipid bilayers. Sodium was used as a counterion.

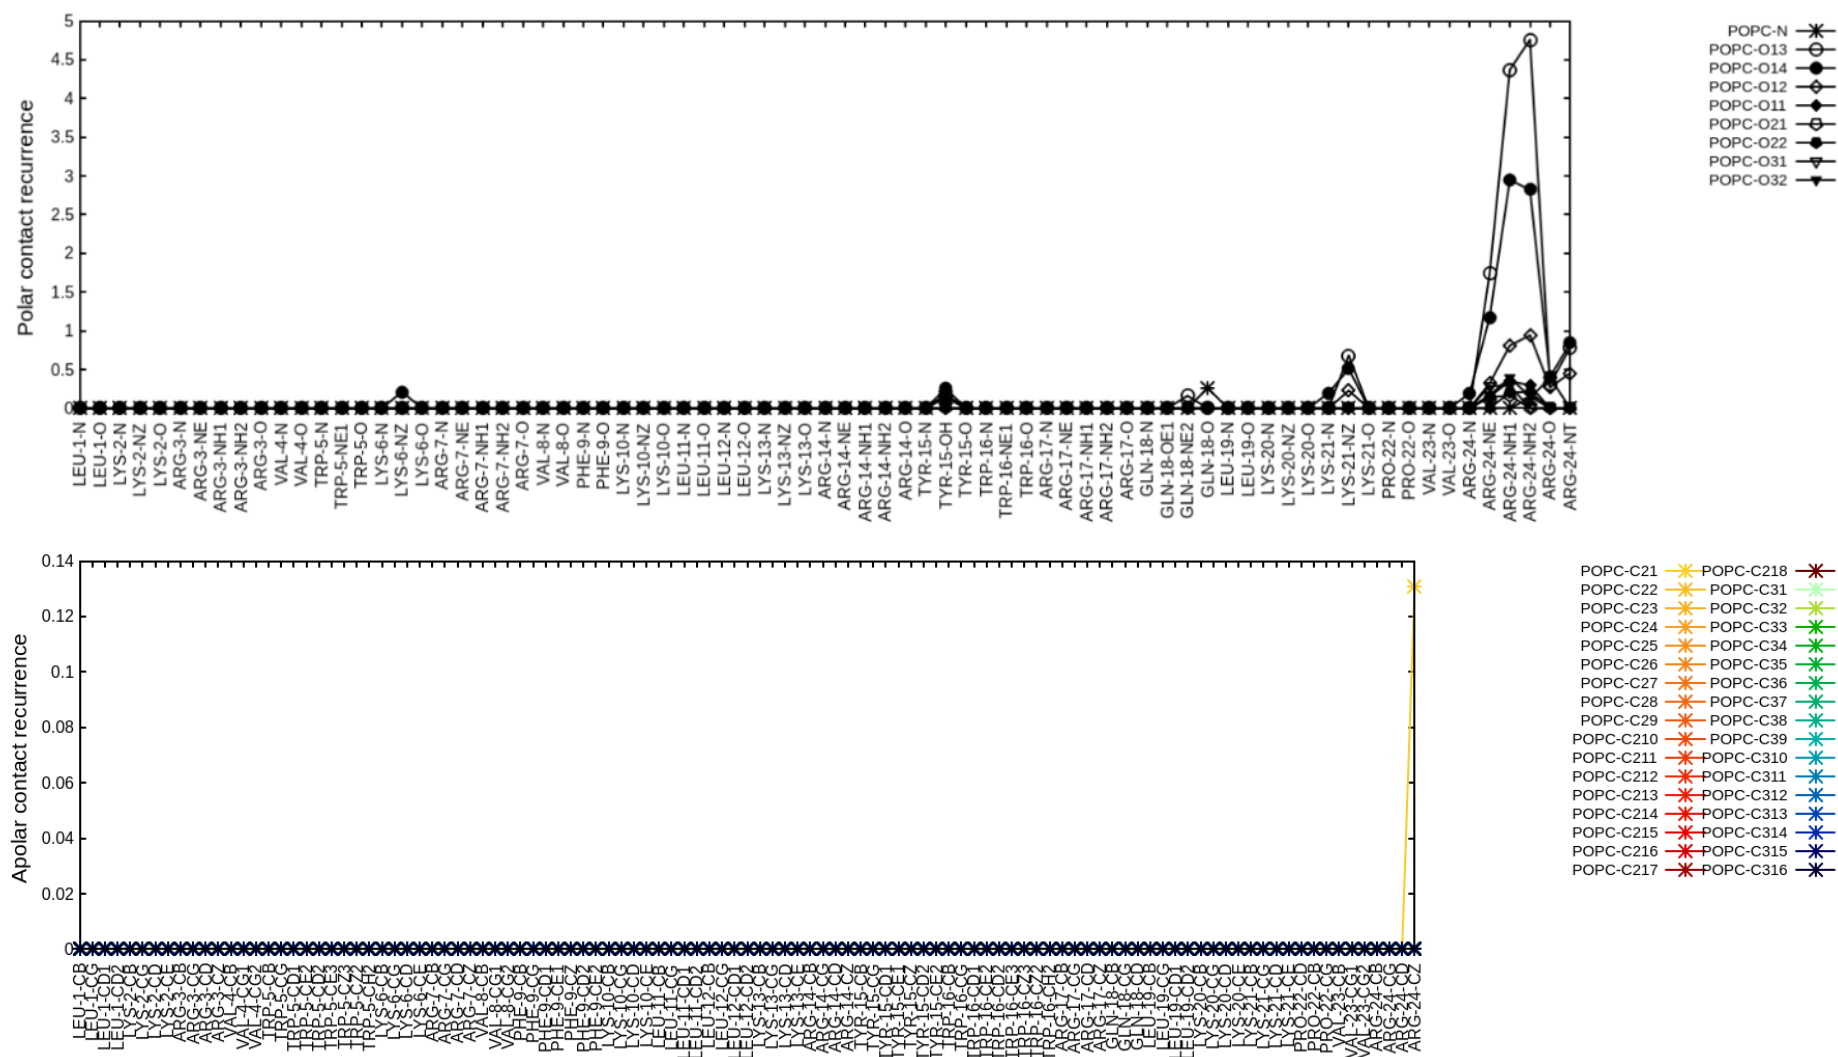

**Figure S6.** Polar (hydrogen bonds and salt bridges) and apolar (van der Waals interactions) contacts of SAAP-148 with POPC in presence of calcium.

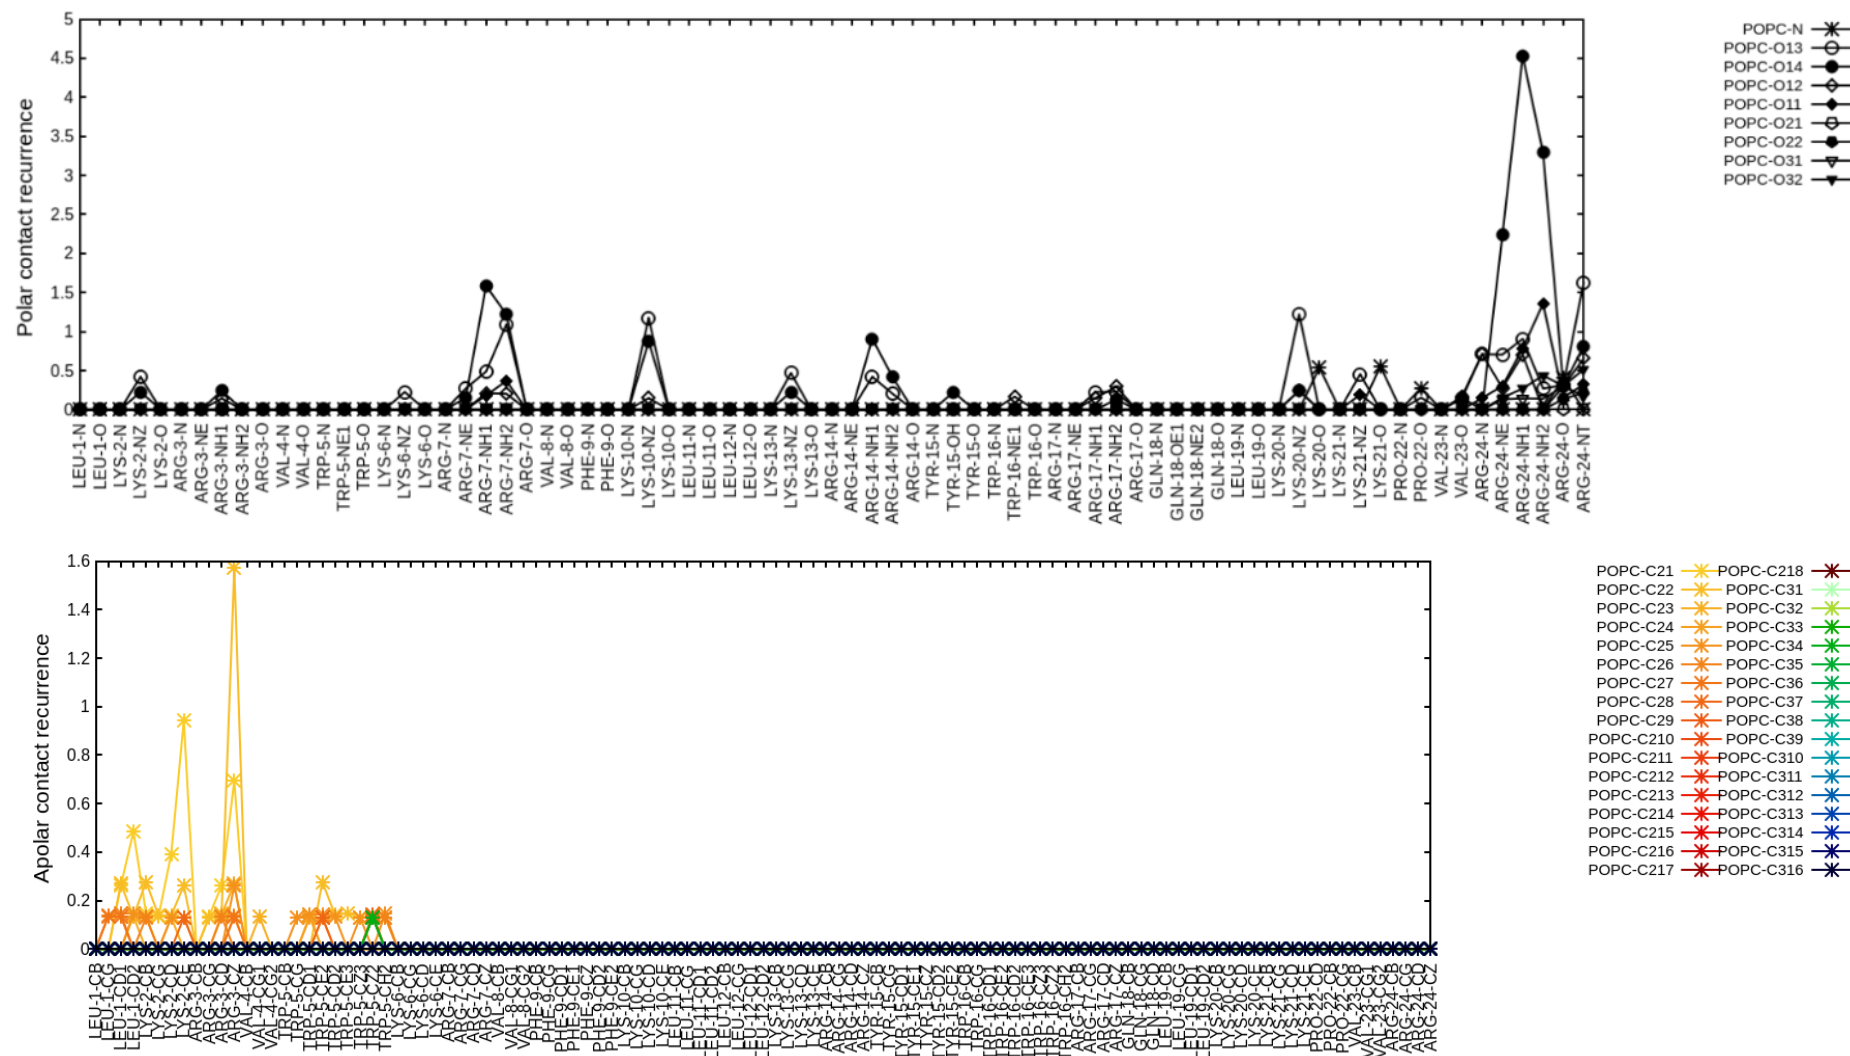

**Figure S7.** Polar (hydrogen bonds and salt bridges) and apolar (van der Waals interactions) contacts of SAAP-148 with POPC in presence of magnesium.



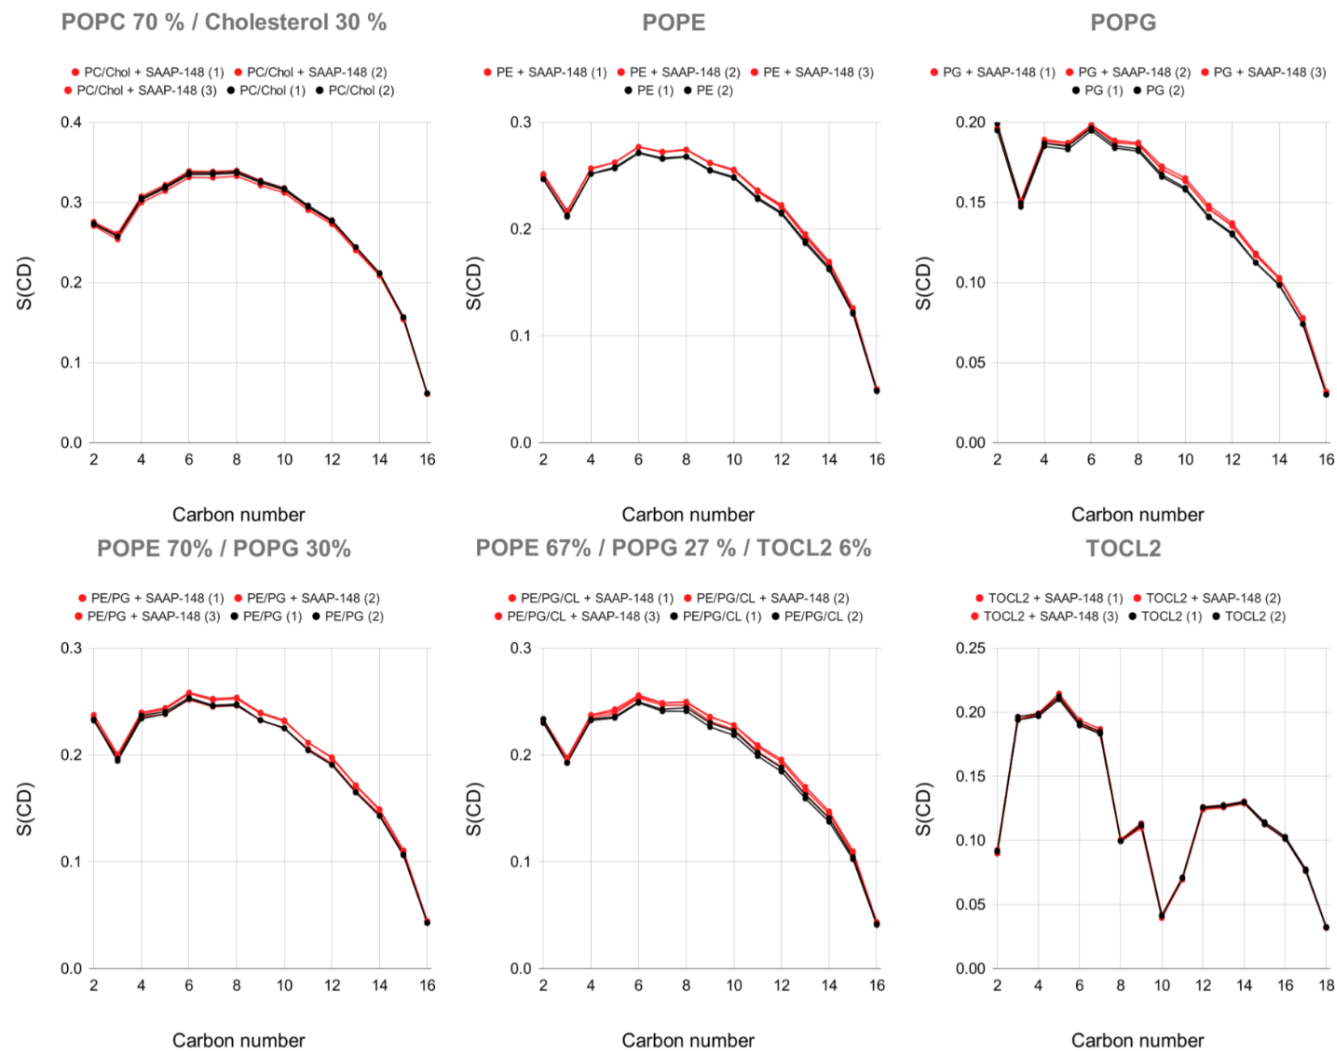

**Figure S9.** Order parameter for different bilayer models mimicking common bacterial and mammalian lipids with (in red) and without (in black) one molecule of SAAP-148 peptide. Sodium was used as a counterion.



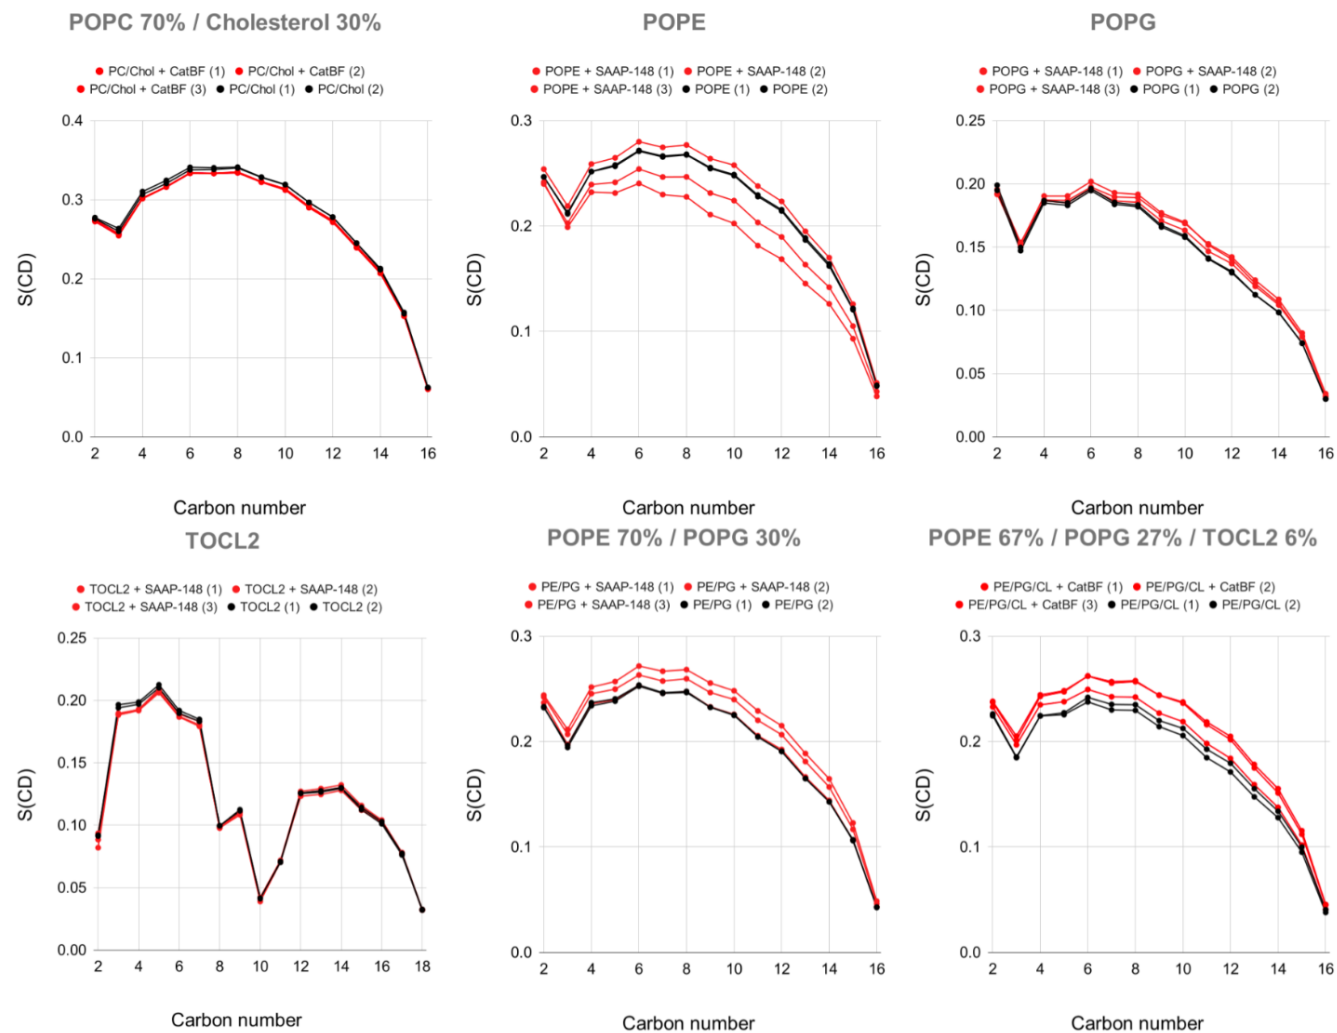

**Figure S10.** Order parameter for different bilayer models mimicking common bacterial and mammalian lipids with (in red) and without (in black) multiple SAAP-148 peptides. Sodium was used as a counterion.

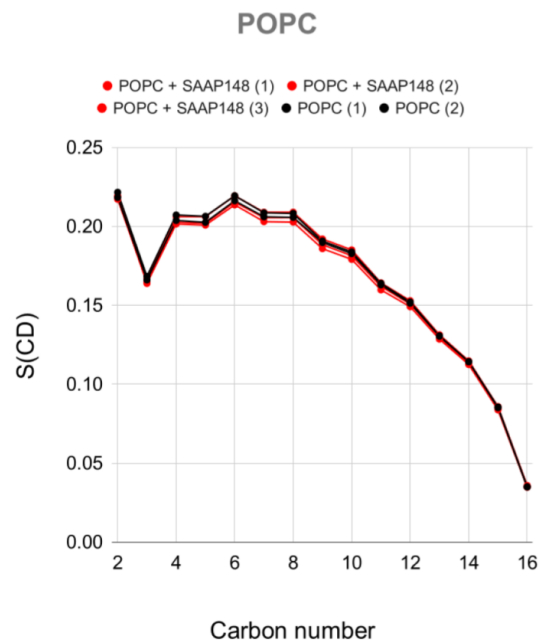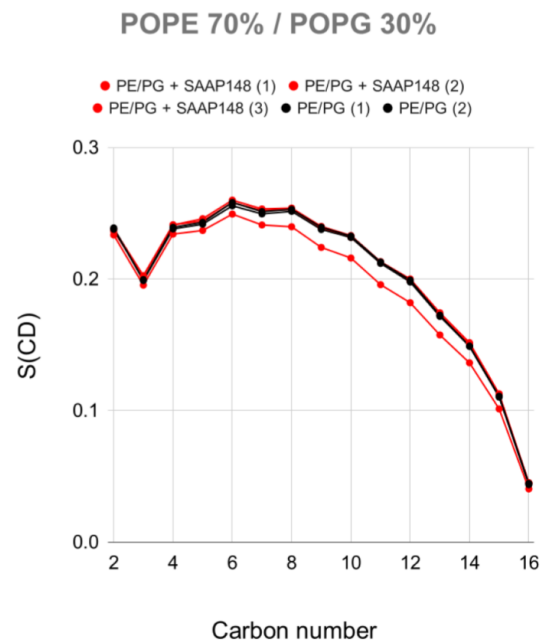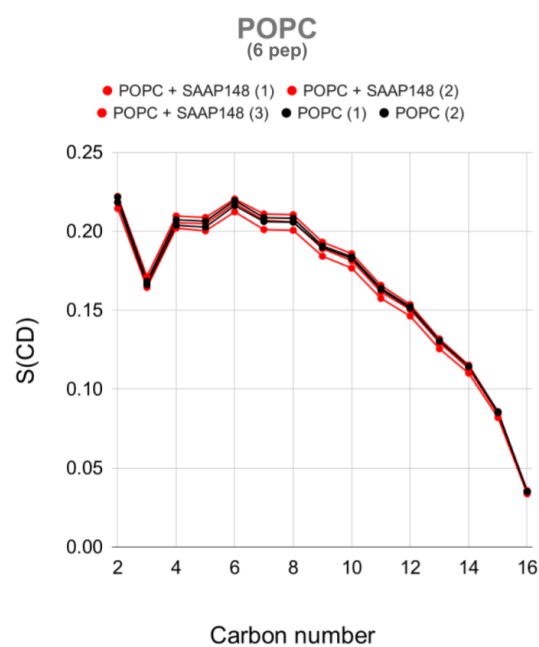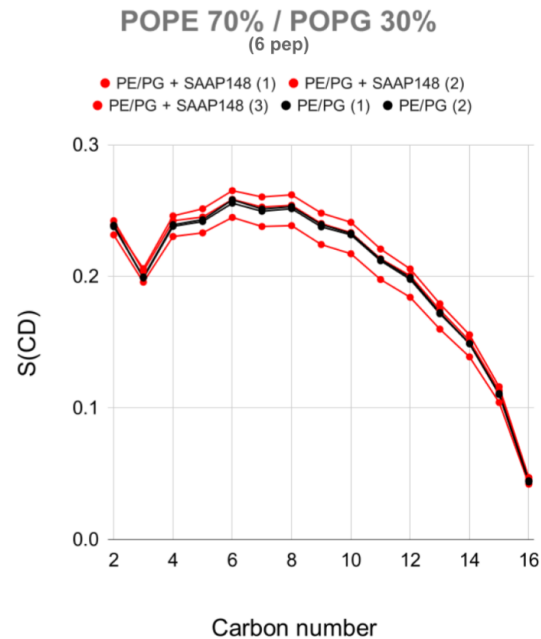

**Figure S11.** Order parameter for different bilayer models mimicking common bacterial and mammalian lipids with (in red) and without (in black) single (up) or multiple (down) SAAP-148 peptides in presence of calcium.



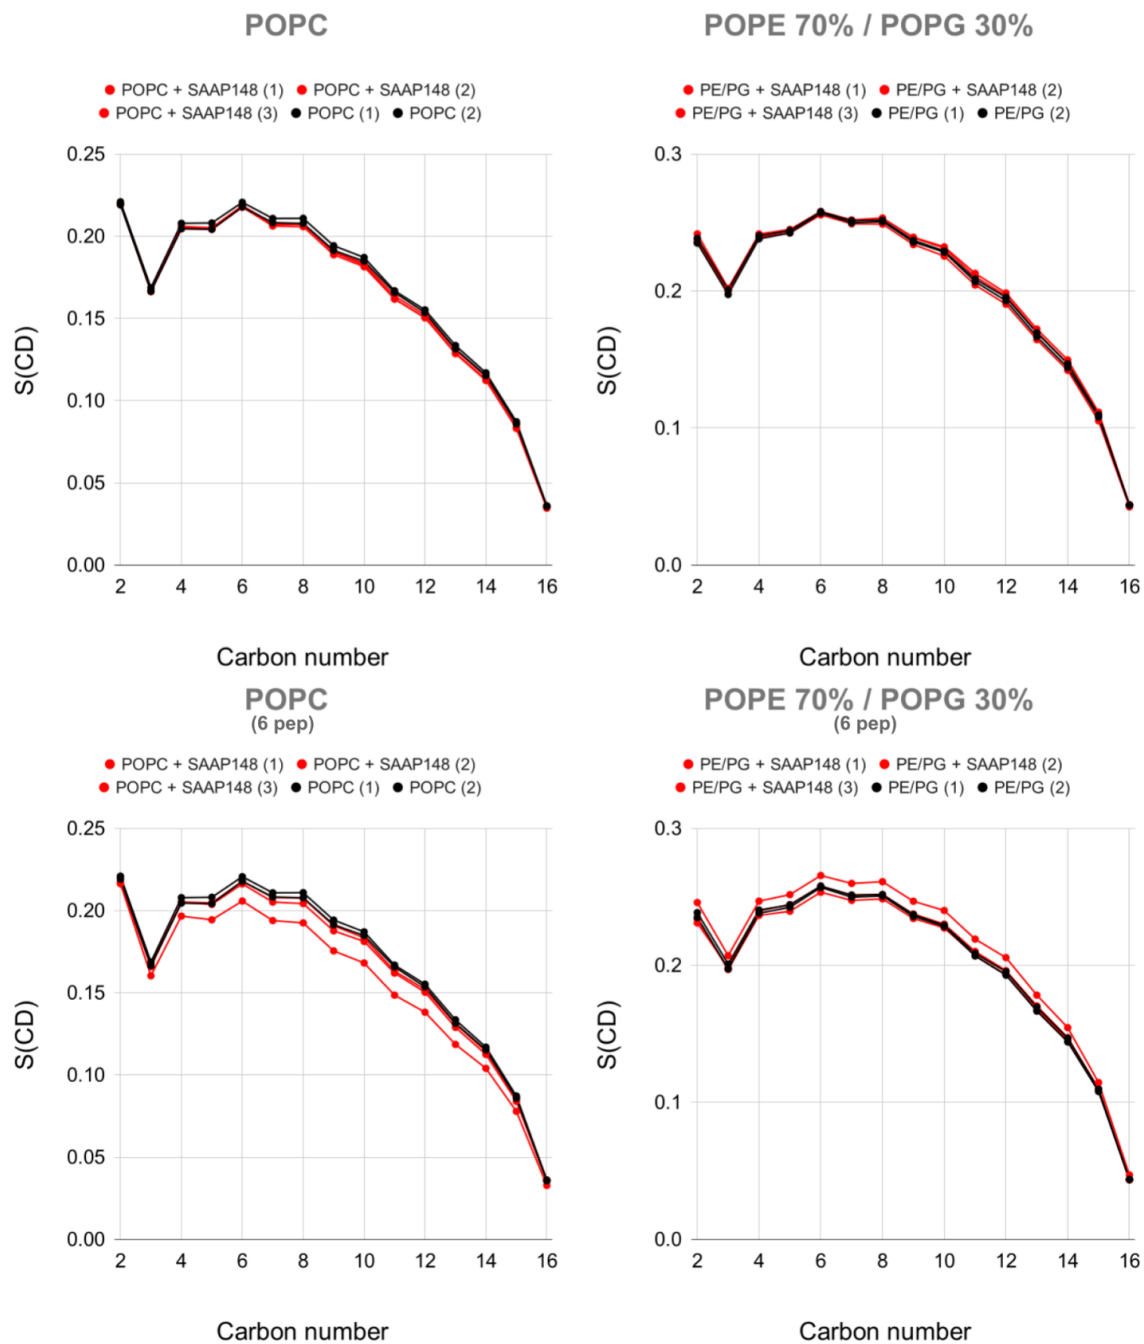

**Figure S12.** Order parameter for different bilayer models mimicking common bacterial and mammalian lipids with (in red) and without (in black) single (up) or multiple (down) SAAP-148 peptide in presence of magnesium.

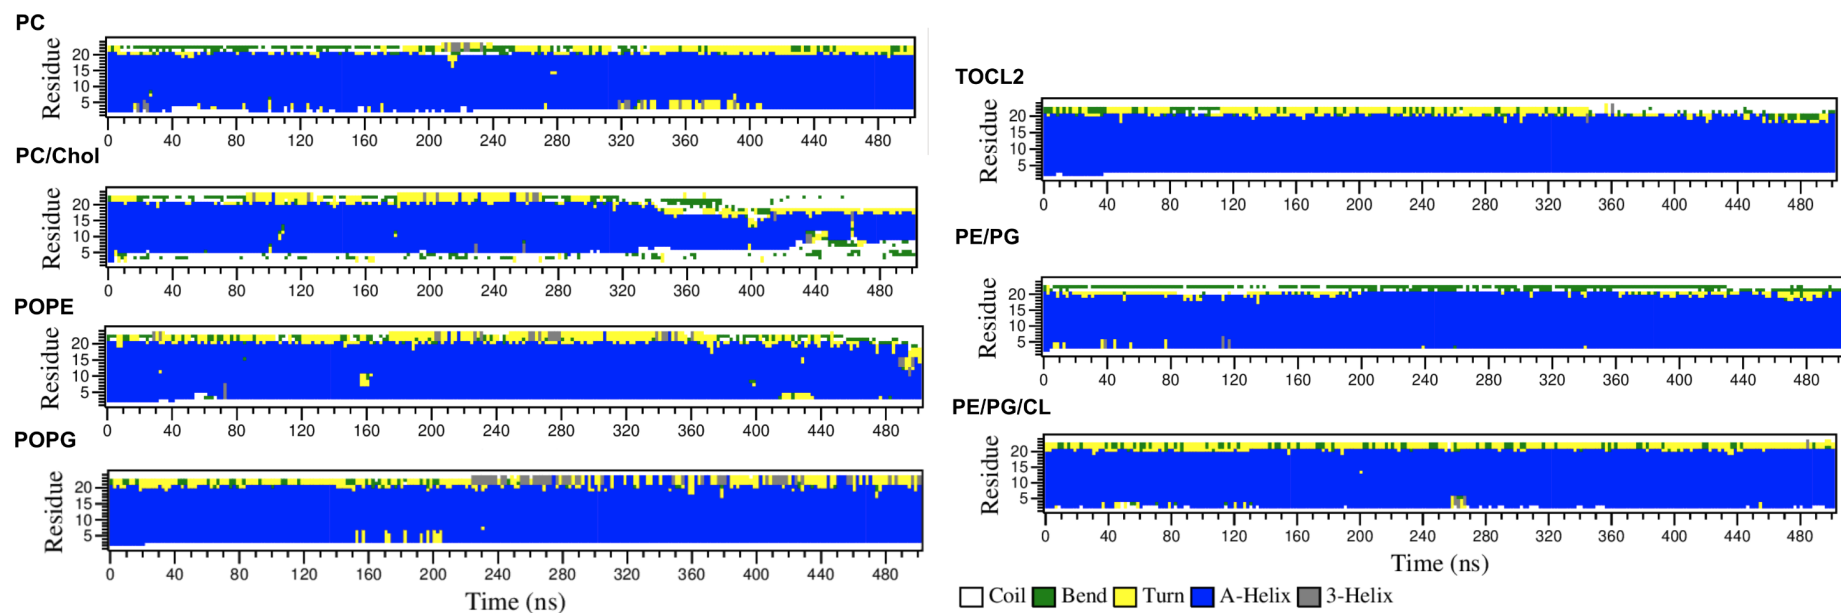

**Figure S13.** DSSP secondary structures calculated along molecular dynamics (MD) simulations. Sodium was used as a counterion.

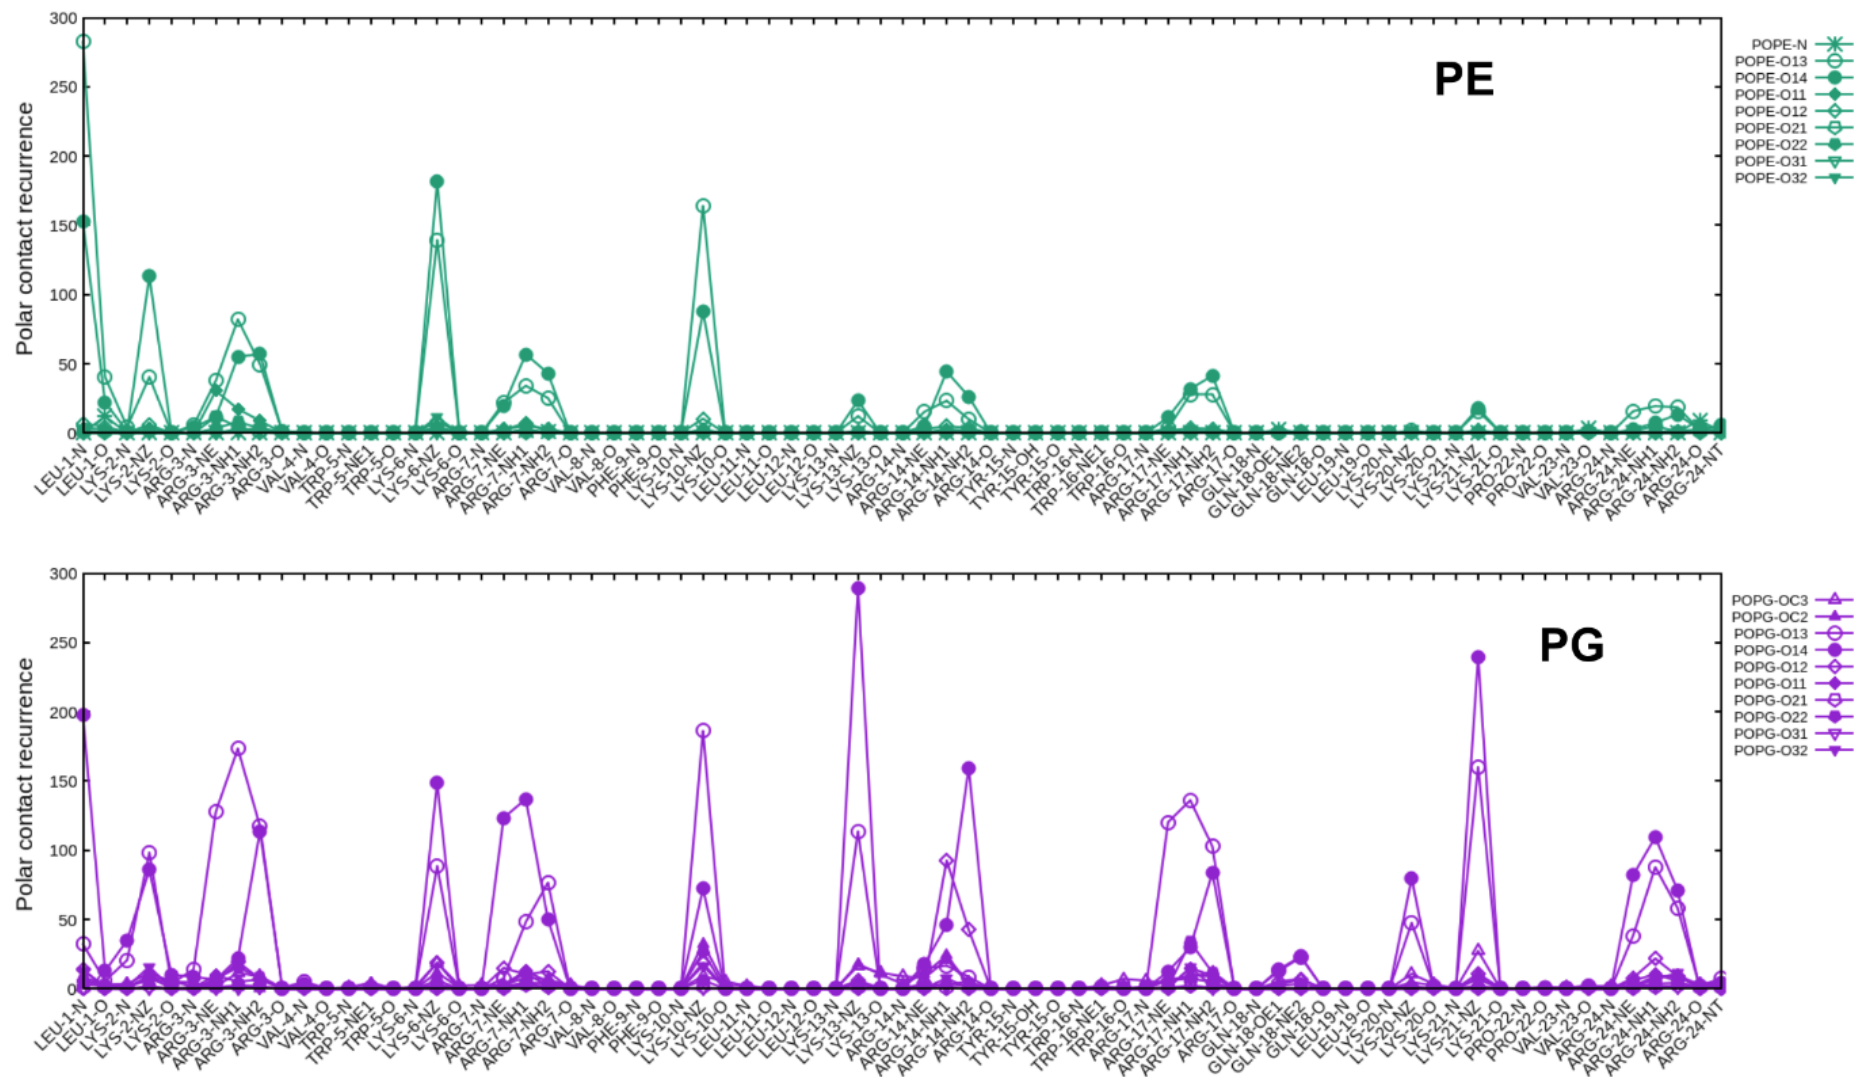

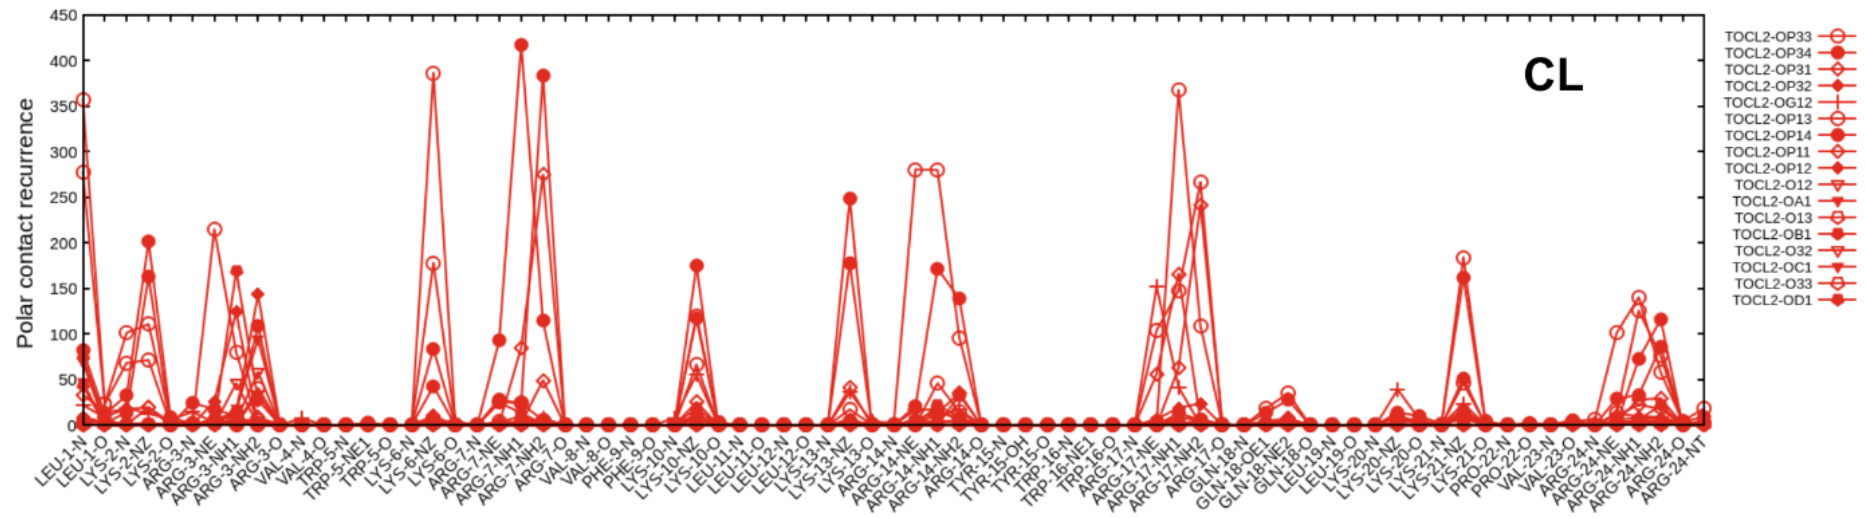

**Figure S15.** Polar contacts (hydrogen bonds and salt bridges) of SAAP-148 with different lipid bilayers. Sodium was used as a counterion.

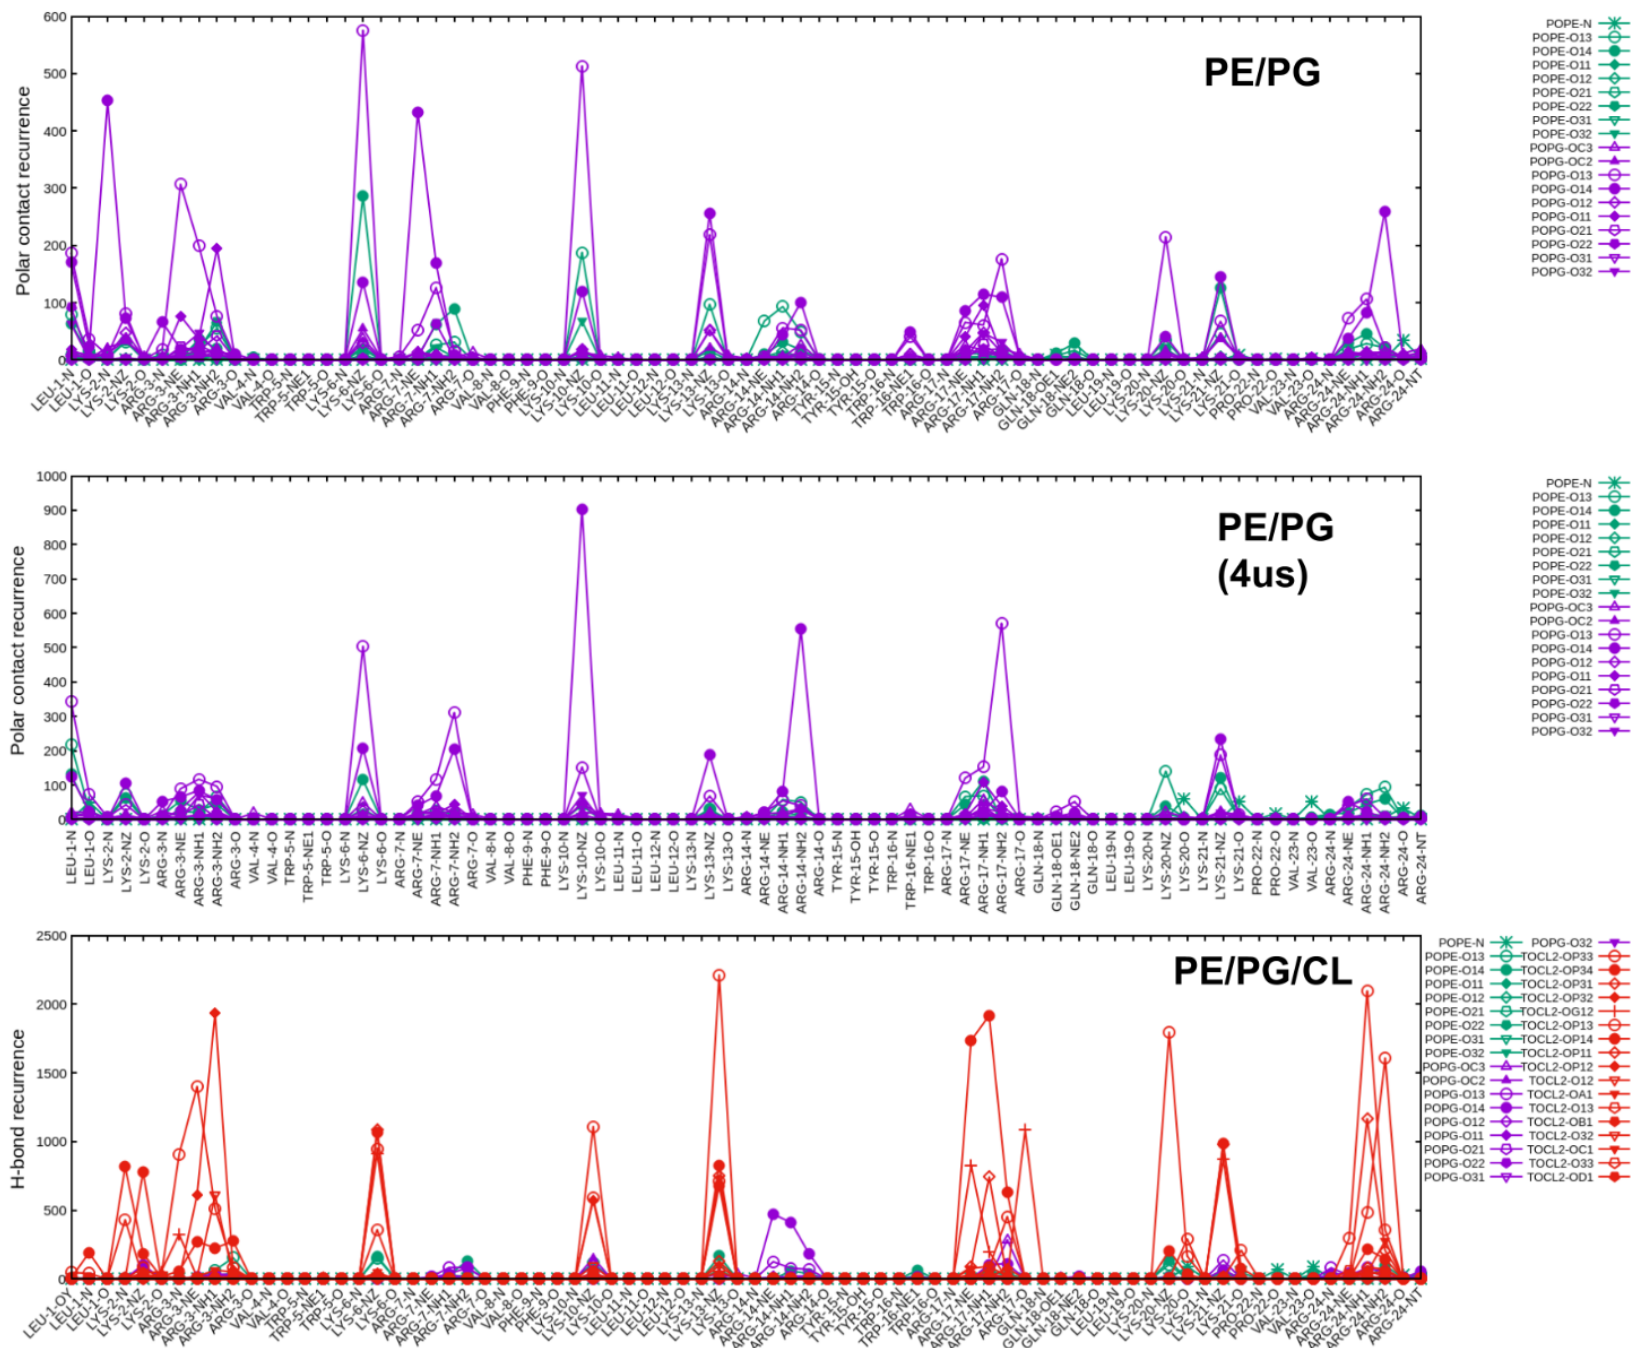

**Figure S16.** Polar contacts (hydrogen bonds and salt bridges) of SAAP-148 with PE/PG (at 500 ns and 4us) and PE/PG/CL (500 ns) bilayers. Sodium was used as a counterion.

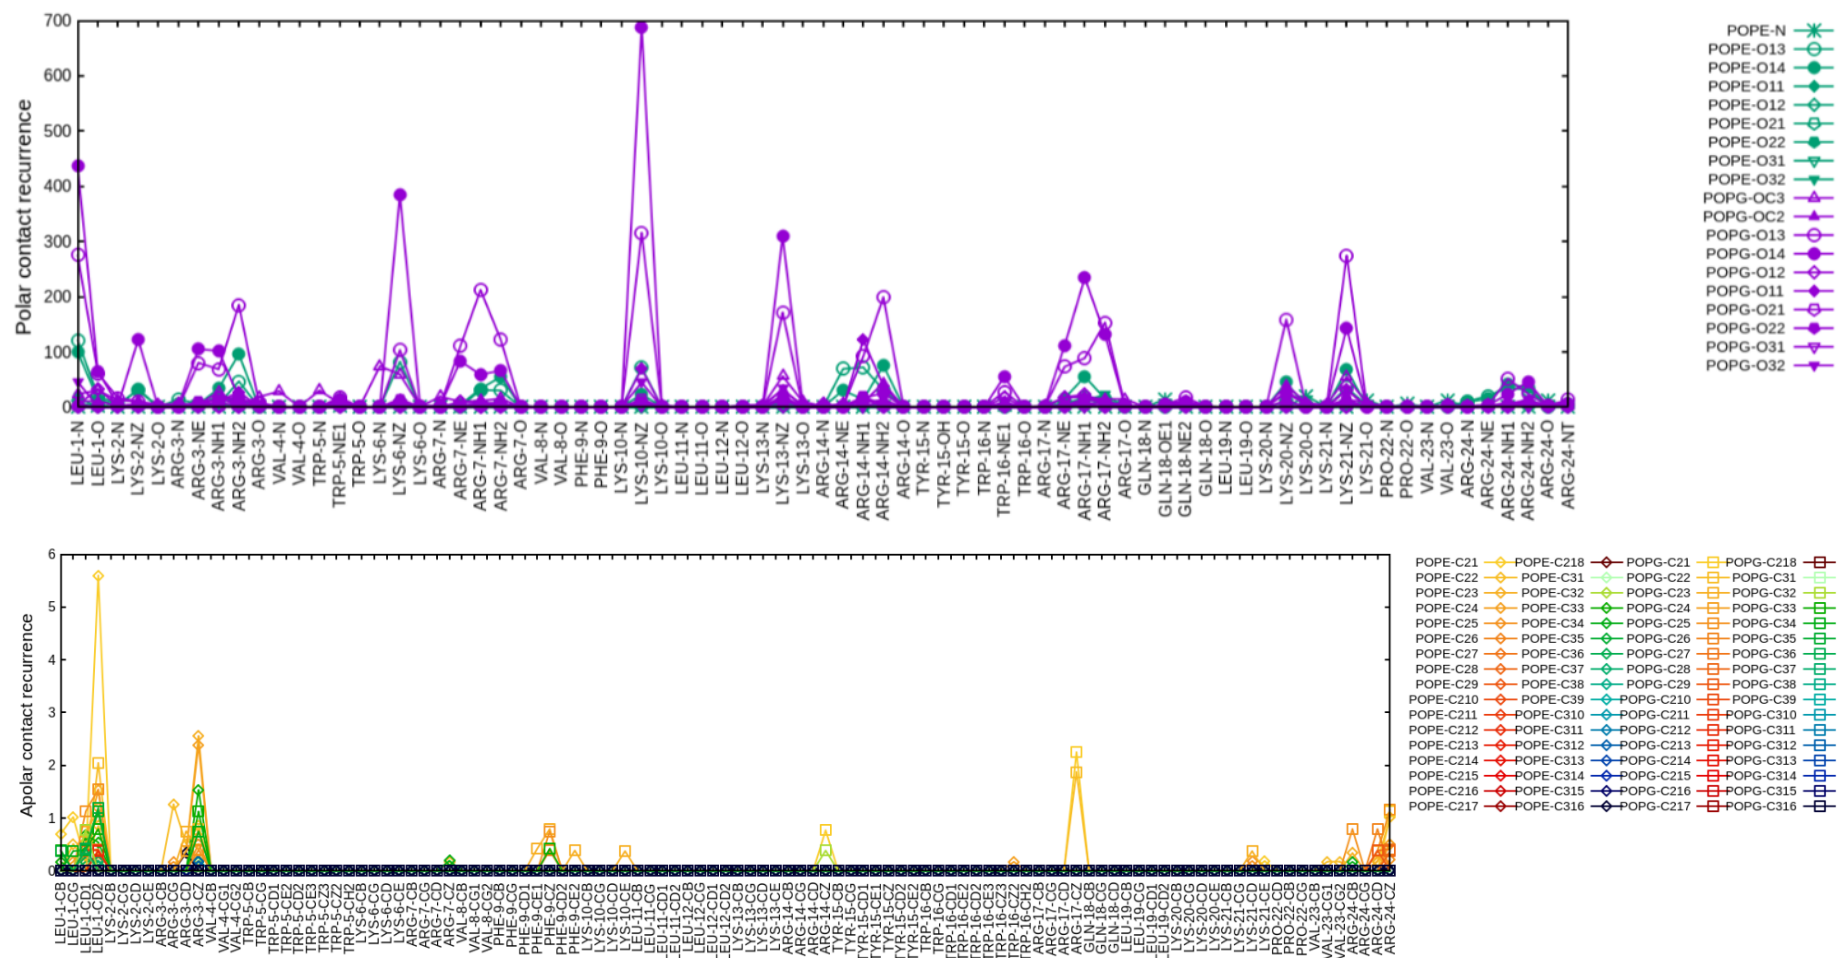

**Figure S17.** Polar (hydrogen bonds and salt bridges) and apolar (van der Waals interactions) contacts of SAAP-148 with POPE/POPG in presence of magnesium.



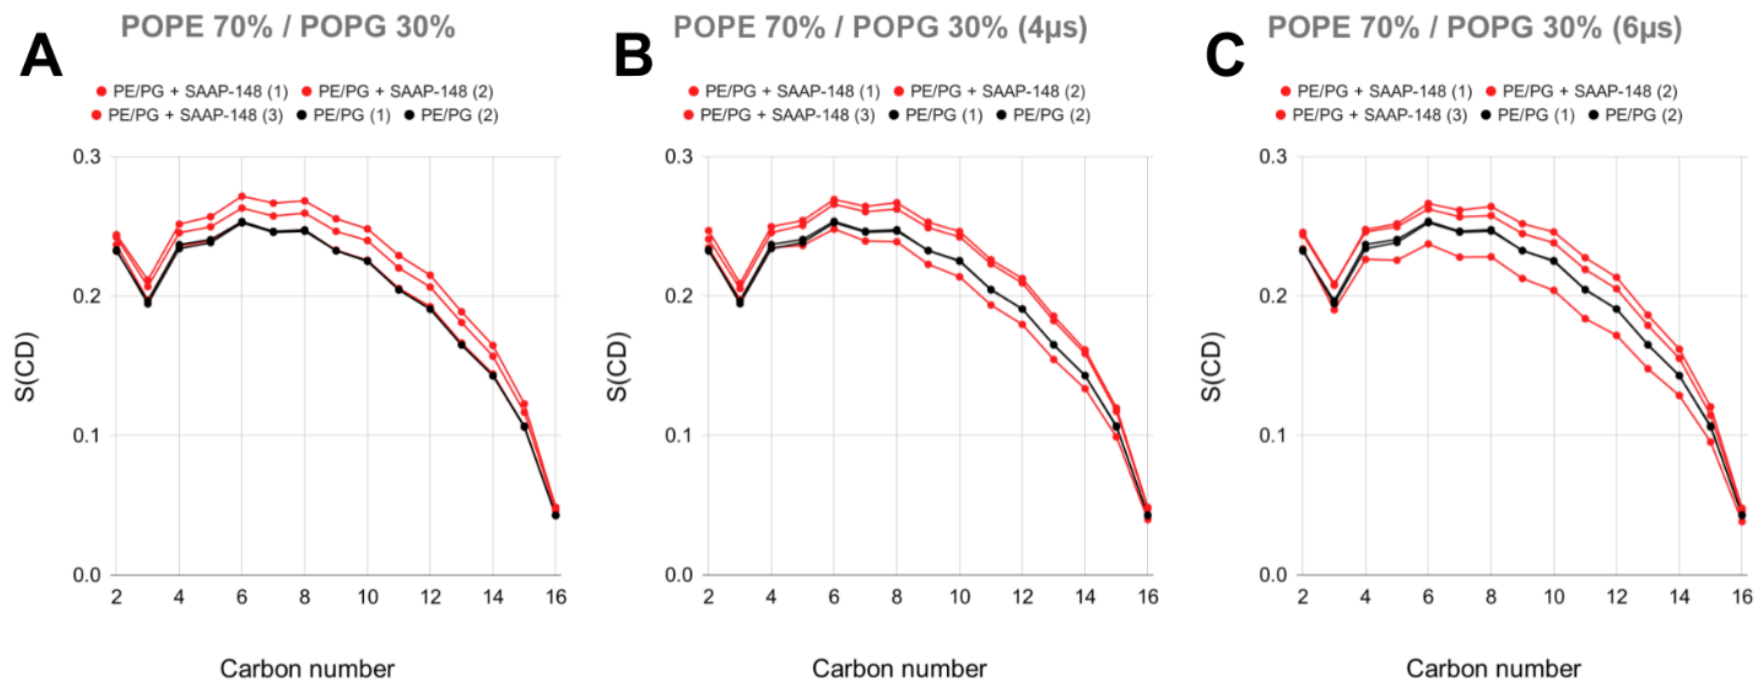

**Figure S18.** Order parameter for POPE/POPG (70:30) bacterial mimicking bilayers with (in red) and without (in black) SAAP-148 multiple peptides. (A) Slight increase of order parameter at 500 ns, (B) decrease at 4  $\mu$ s and (C) 6  $\mu$ s. Sodium was used as a counterion.

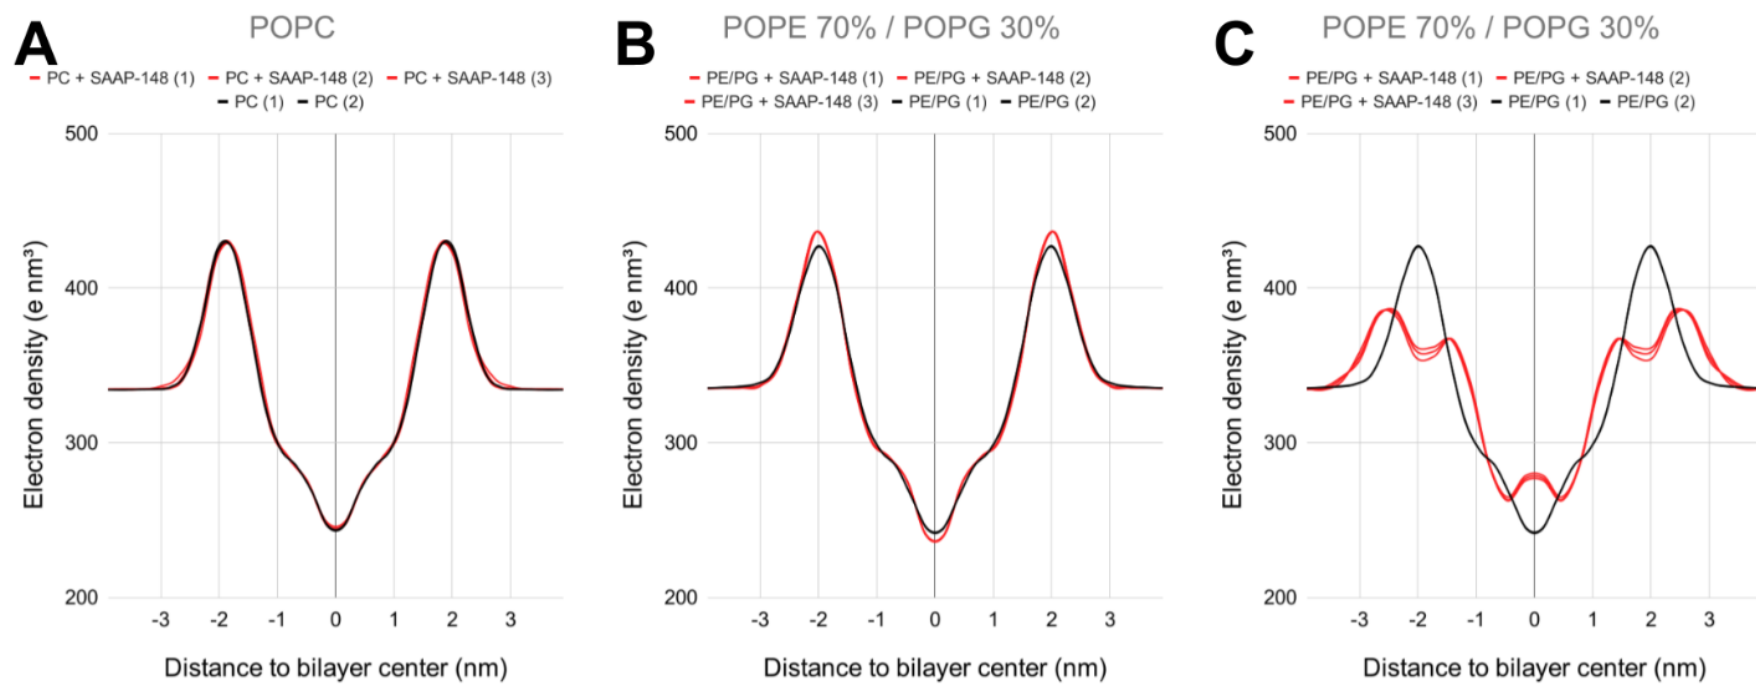

**Figure S19.** Electron density profiles with (in red) and without (in black) SAAP-148 peptide. (A) POPC model mimicking mammalian membranes, (B) POPE/POPG (70:30) model mimicking bacterial membranes at 500 ns and (C) 4 us. Sodium was used as a counterion.



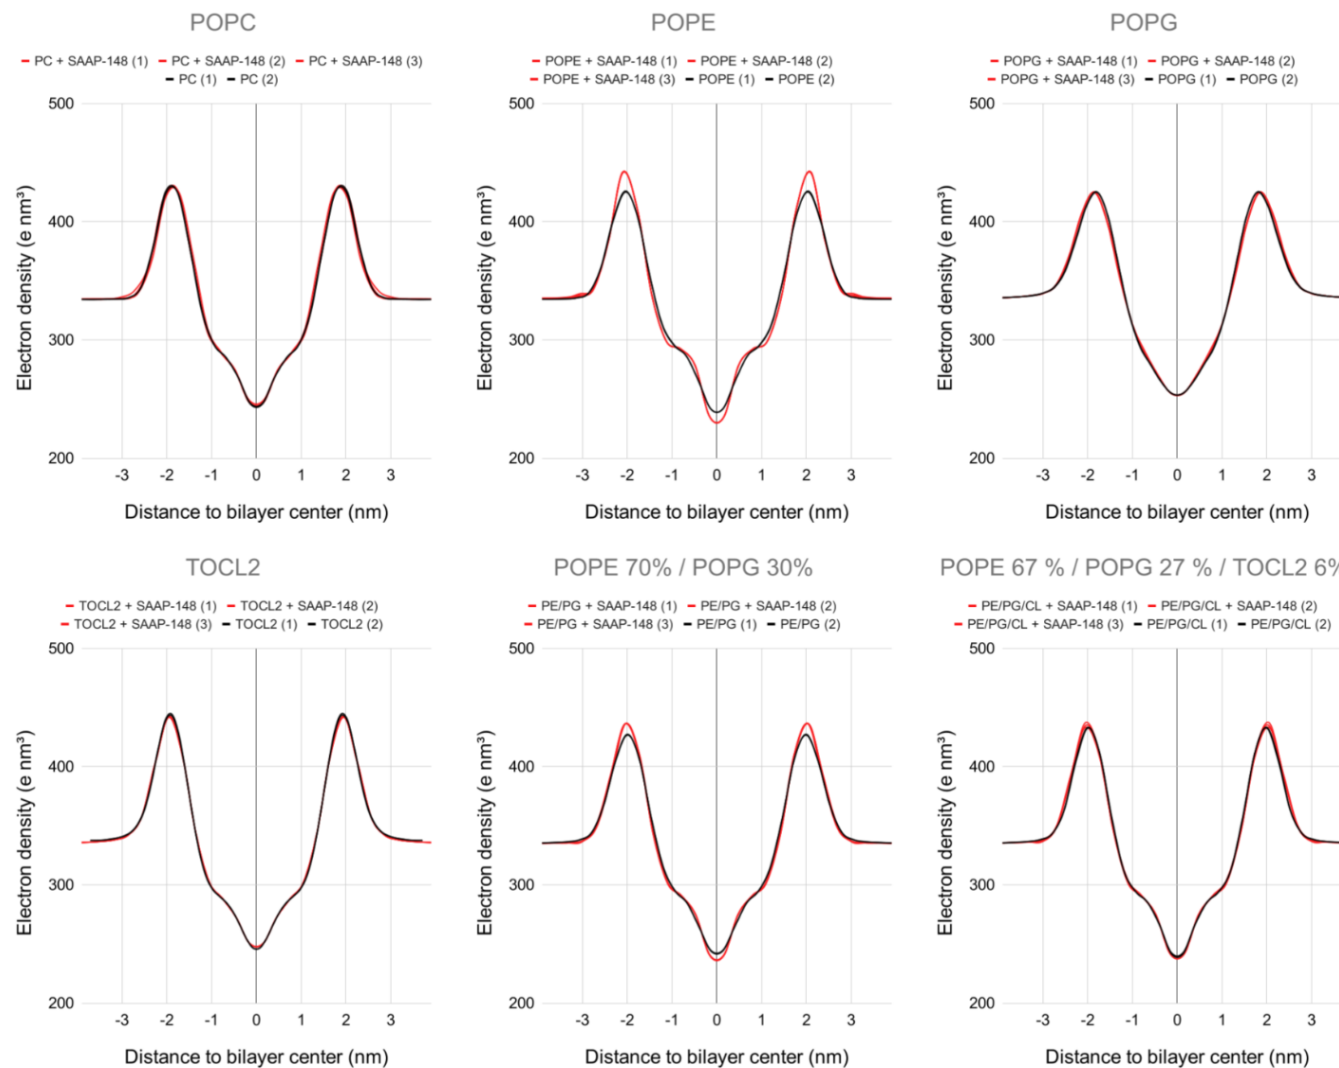

**Figure S20.** Electron density profiles with (in red) and without (in black) SAAP-148 peptide. For different membrane model bilayers. Sodium was used as a counterion.

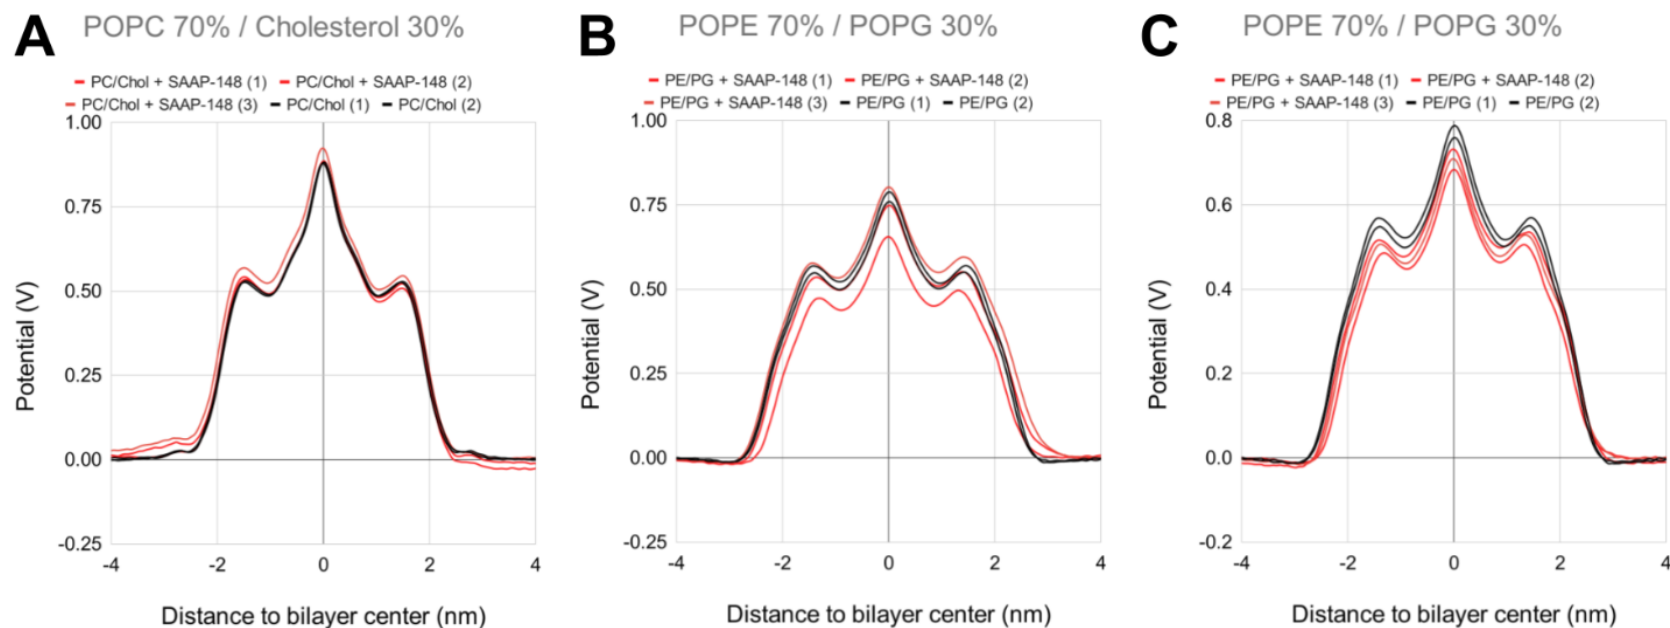

**Figure S21.** Dipole potential profiles with (in red) and without (in black) SAAP-148 peptide. For different membrane model bilayers: (A) POPC:CHO as mammalian cell model, (B) POPE:POPG up to 500 ns and (C) POPE:POPG up to 4 us. Sodium was used as a counterion.

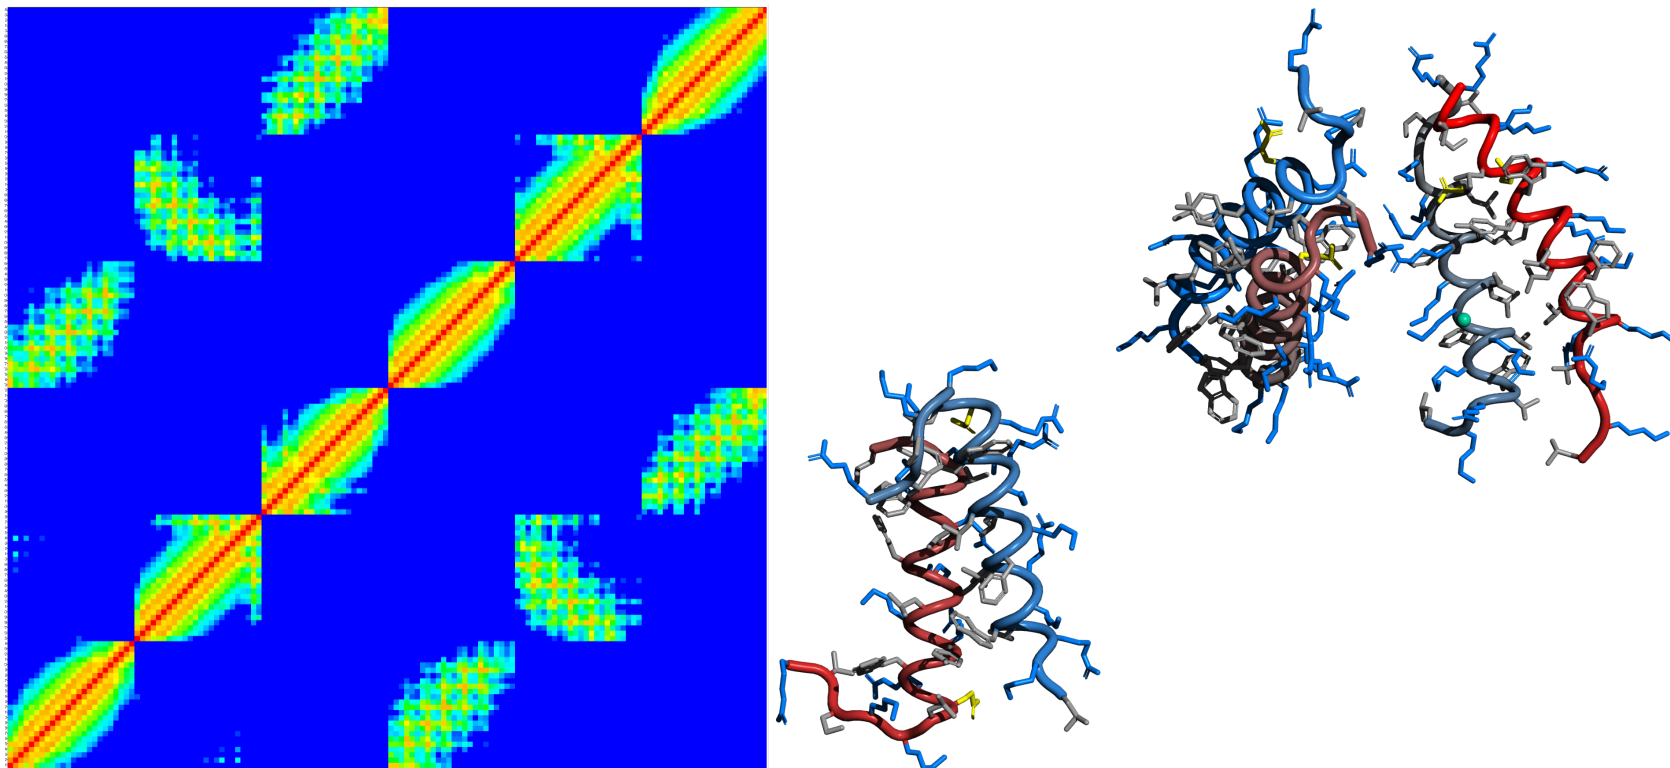

**Figure S22.** Contact map (left) showing the dimerization effect of SAAP-128 (right). Sodium was used as a counterion.

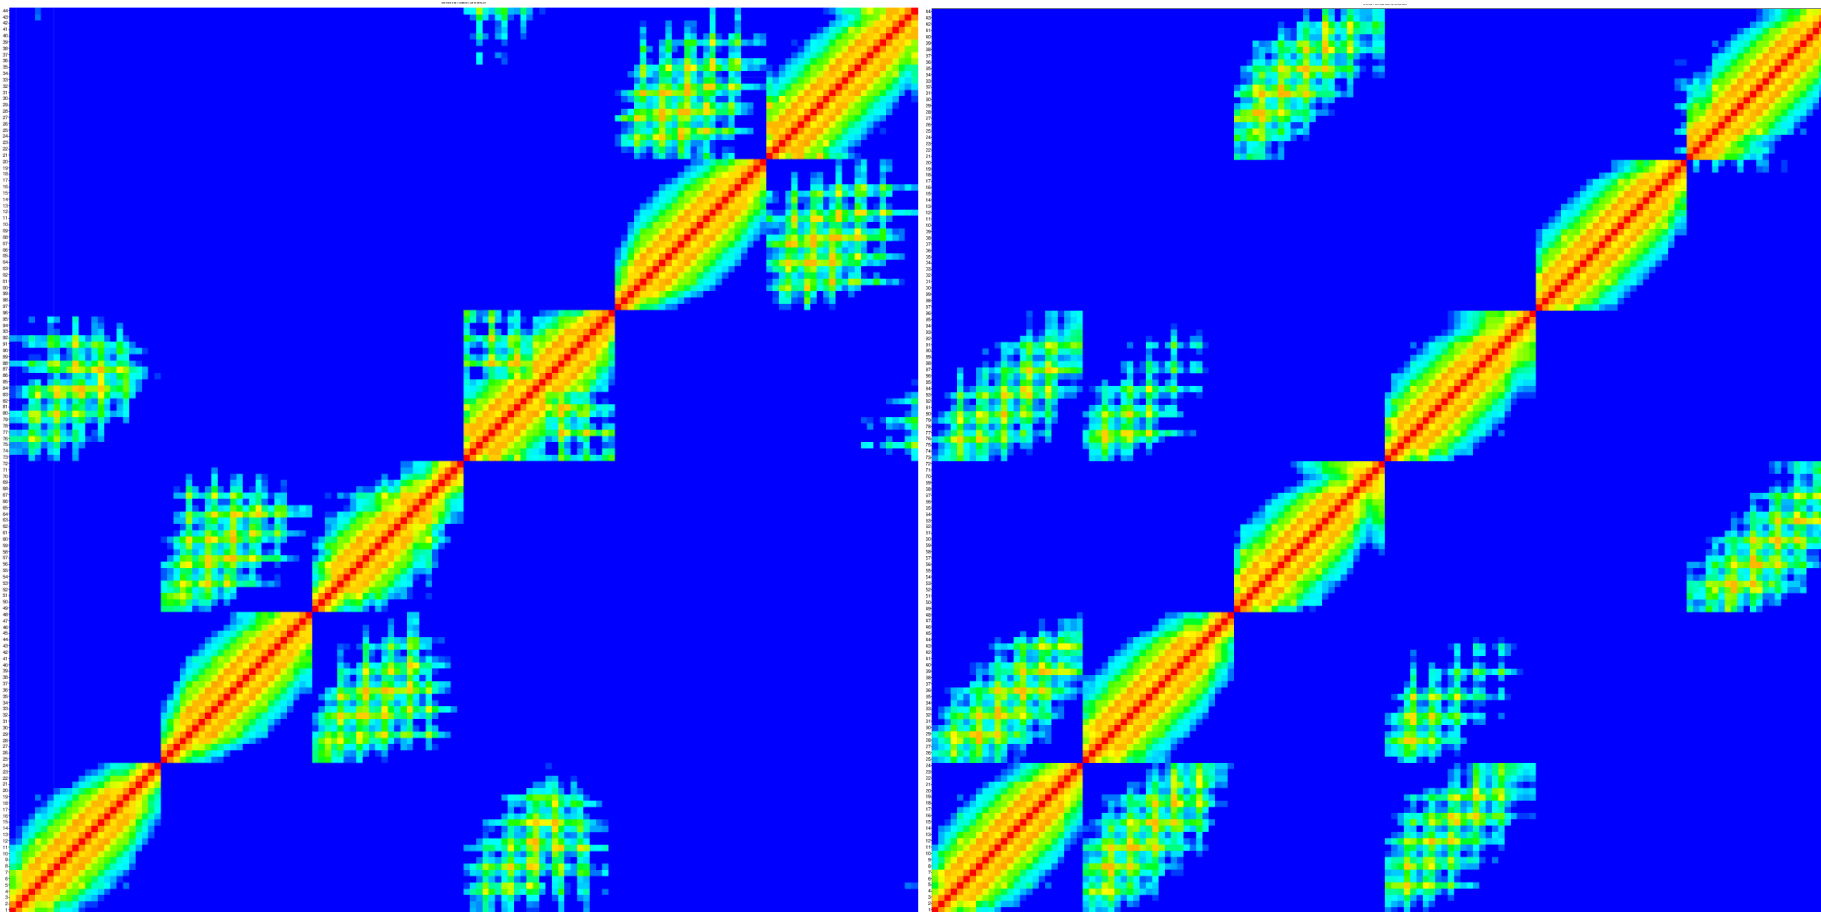

**Figure S23.** Contact maps showing the aggregation behavior in presence of calcium (left) and magnesium (right).

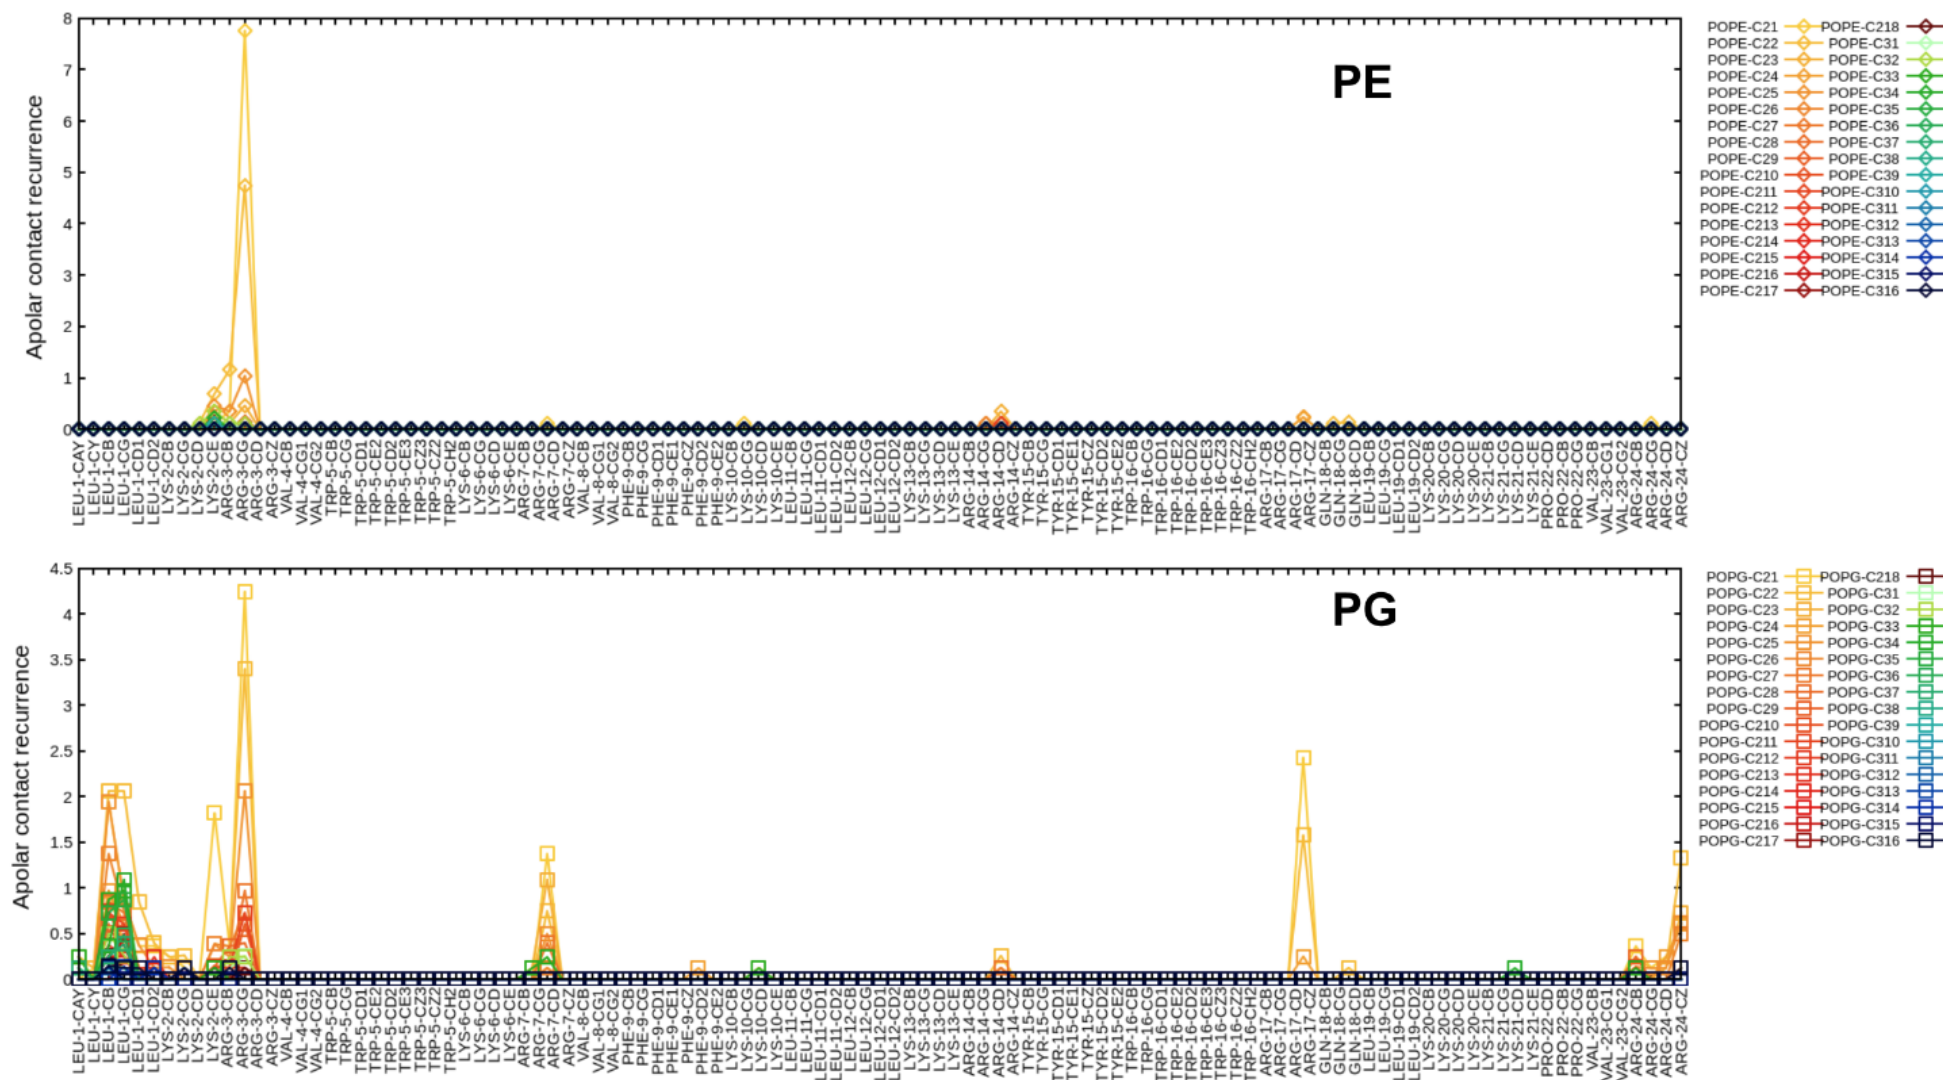

**Figure S24.** Apolar contacts (van der Waals interactions) of SAAP-148 with different lipid bilayers. Sodium was used as a counterion.
